# Supplementary material for: Assessing drug safety by identifying the axis of arrhythmia in cardiomyocyte electrophysiology
Source: eLife journal article supplement (doi:10.7554/elife.90027), 2023-08-21

**Table 2 – source data 2**

**Drugs with Class 1 Torsadogenic risk**

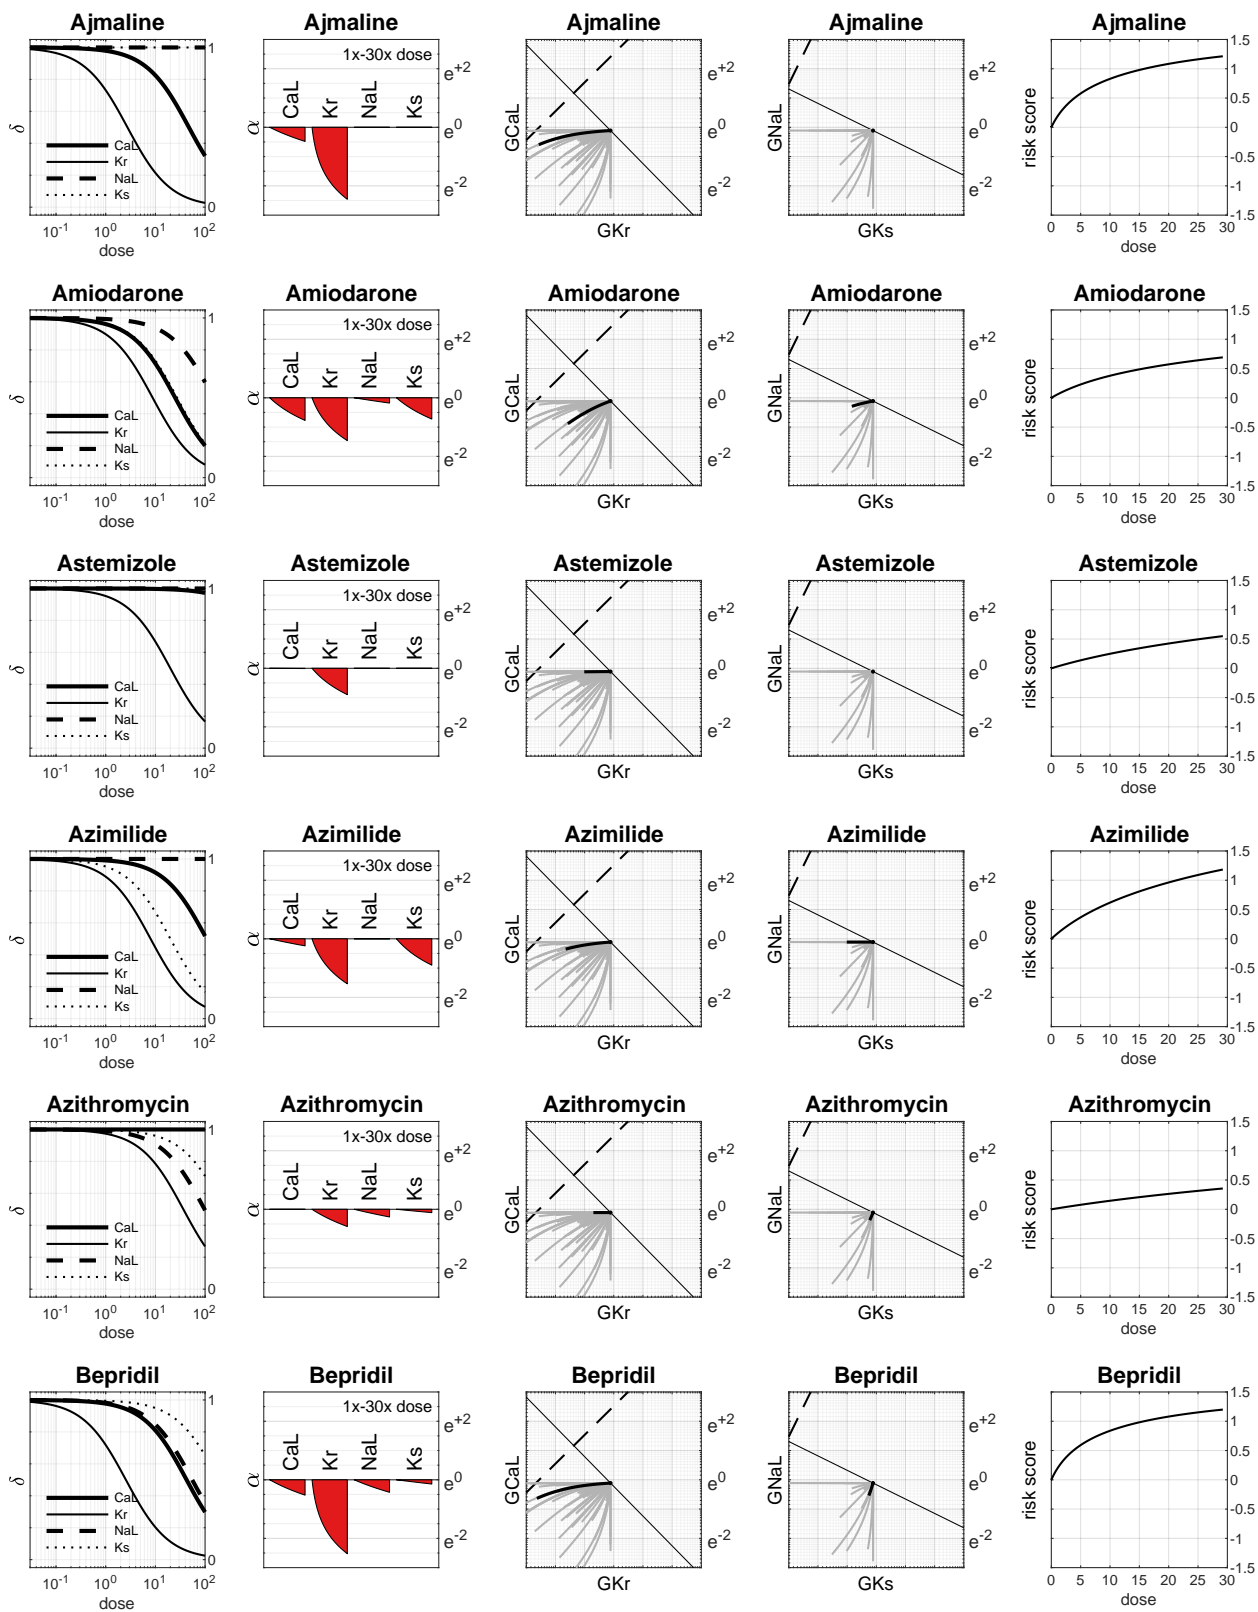

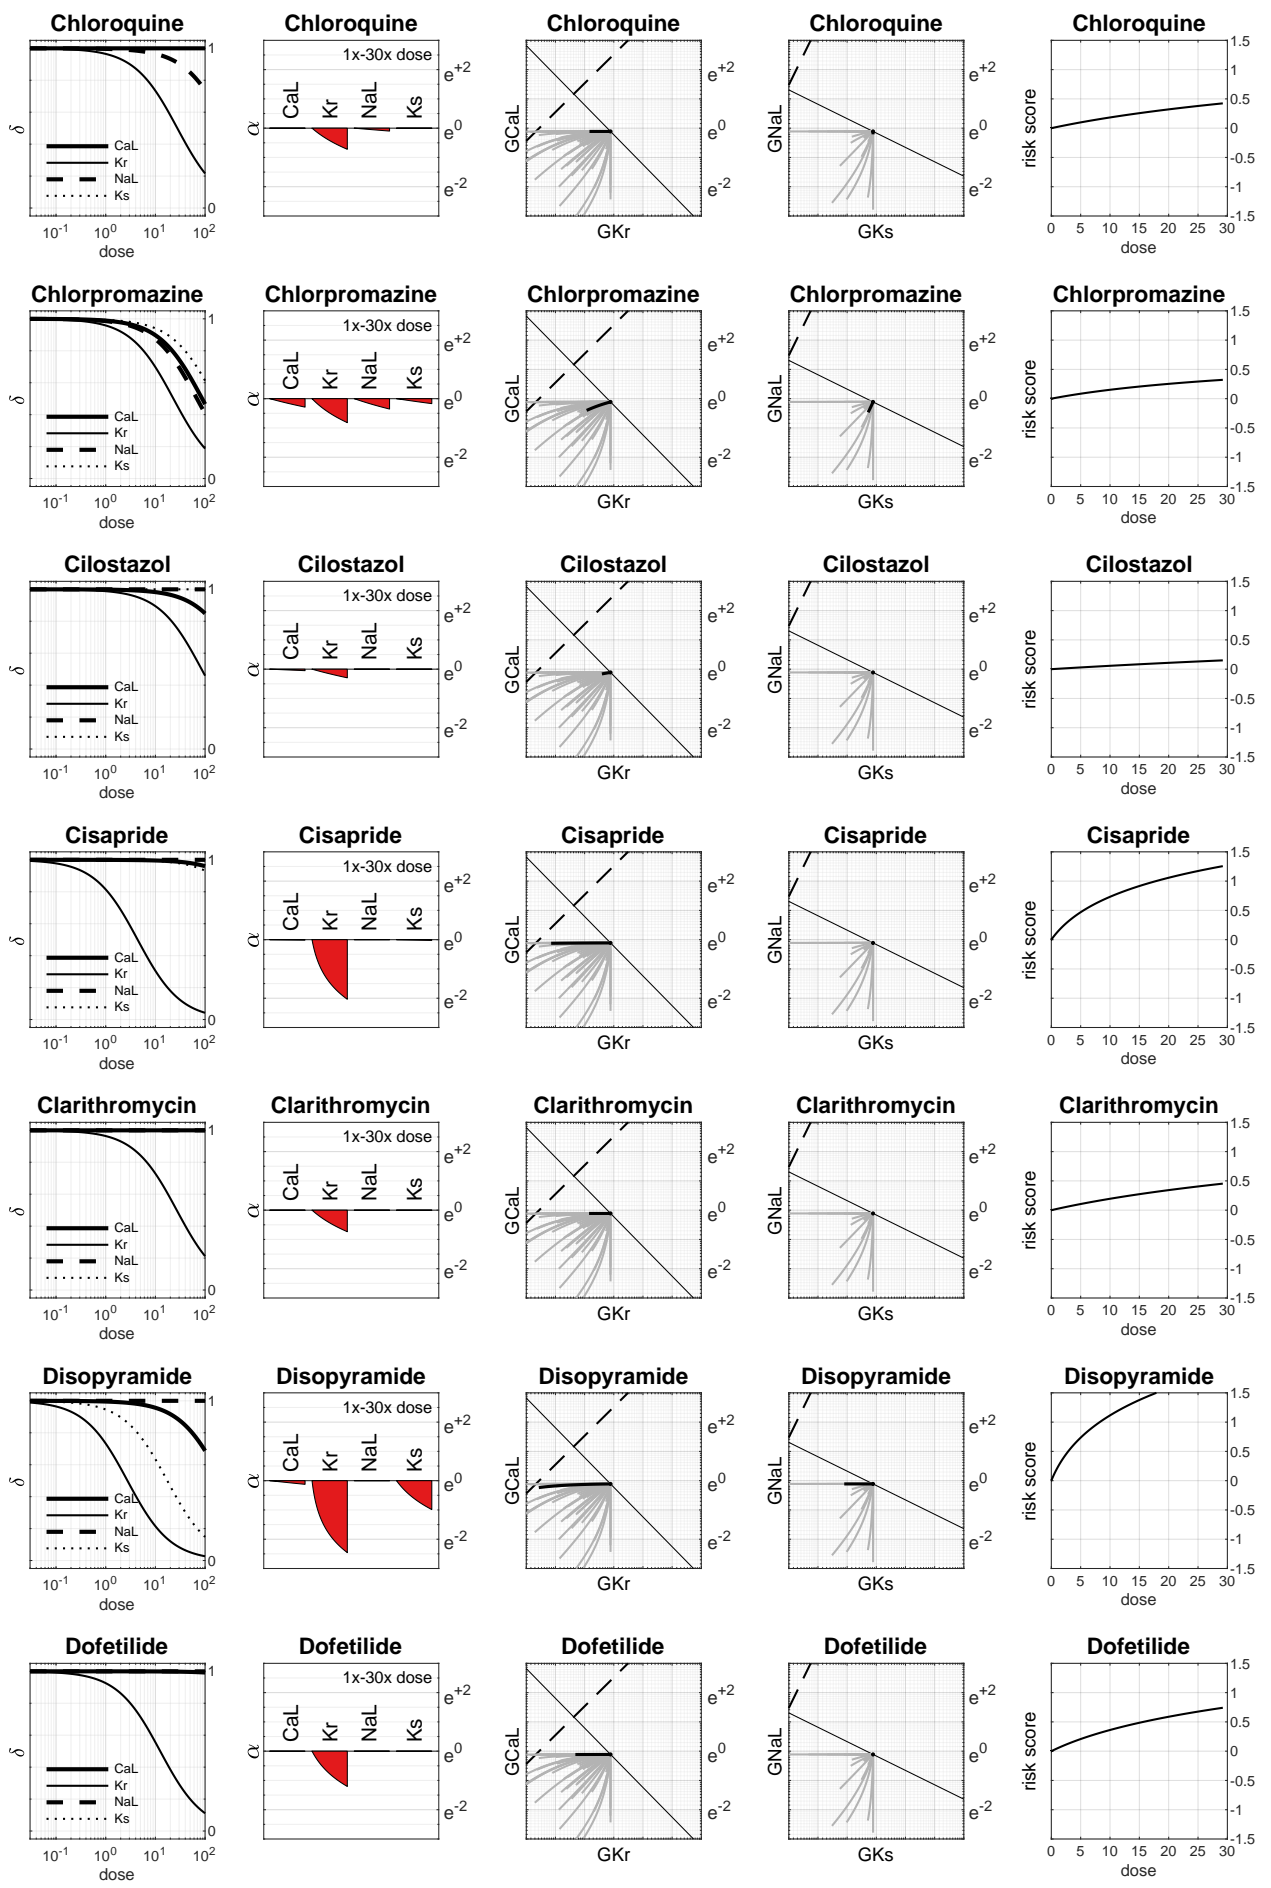

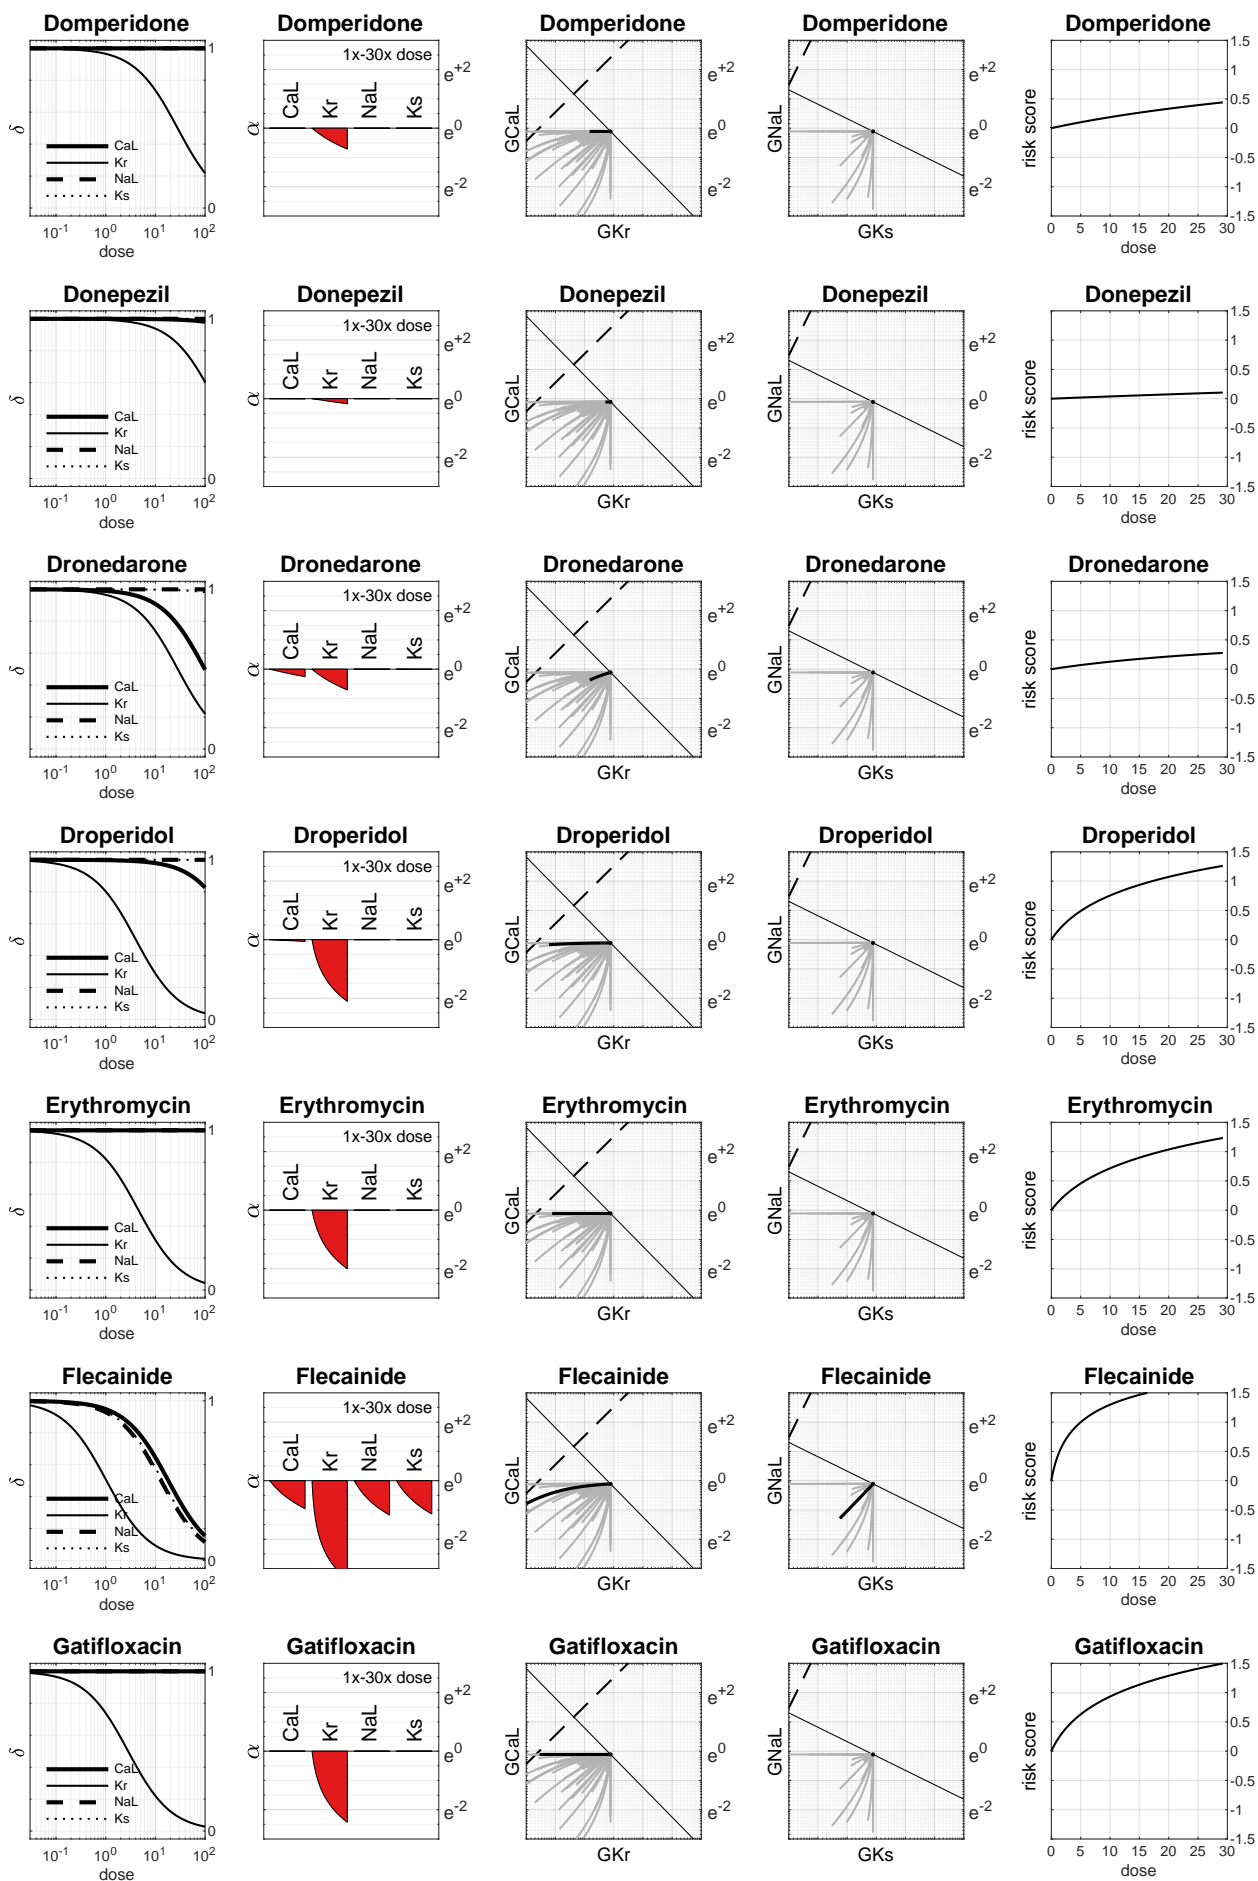

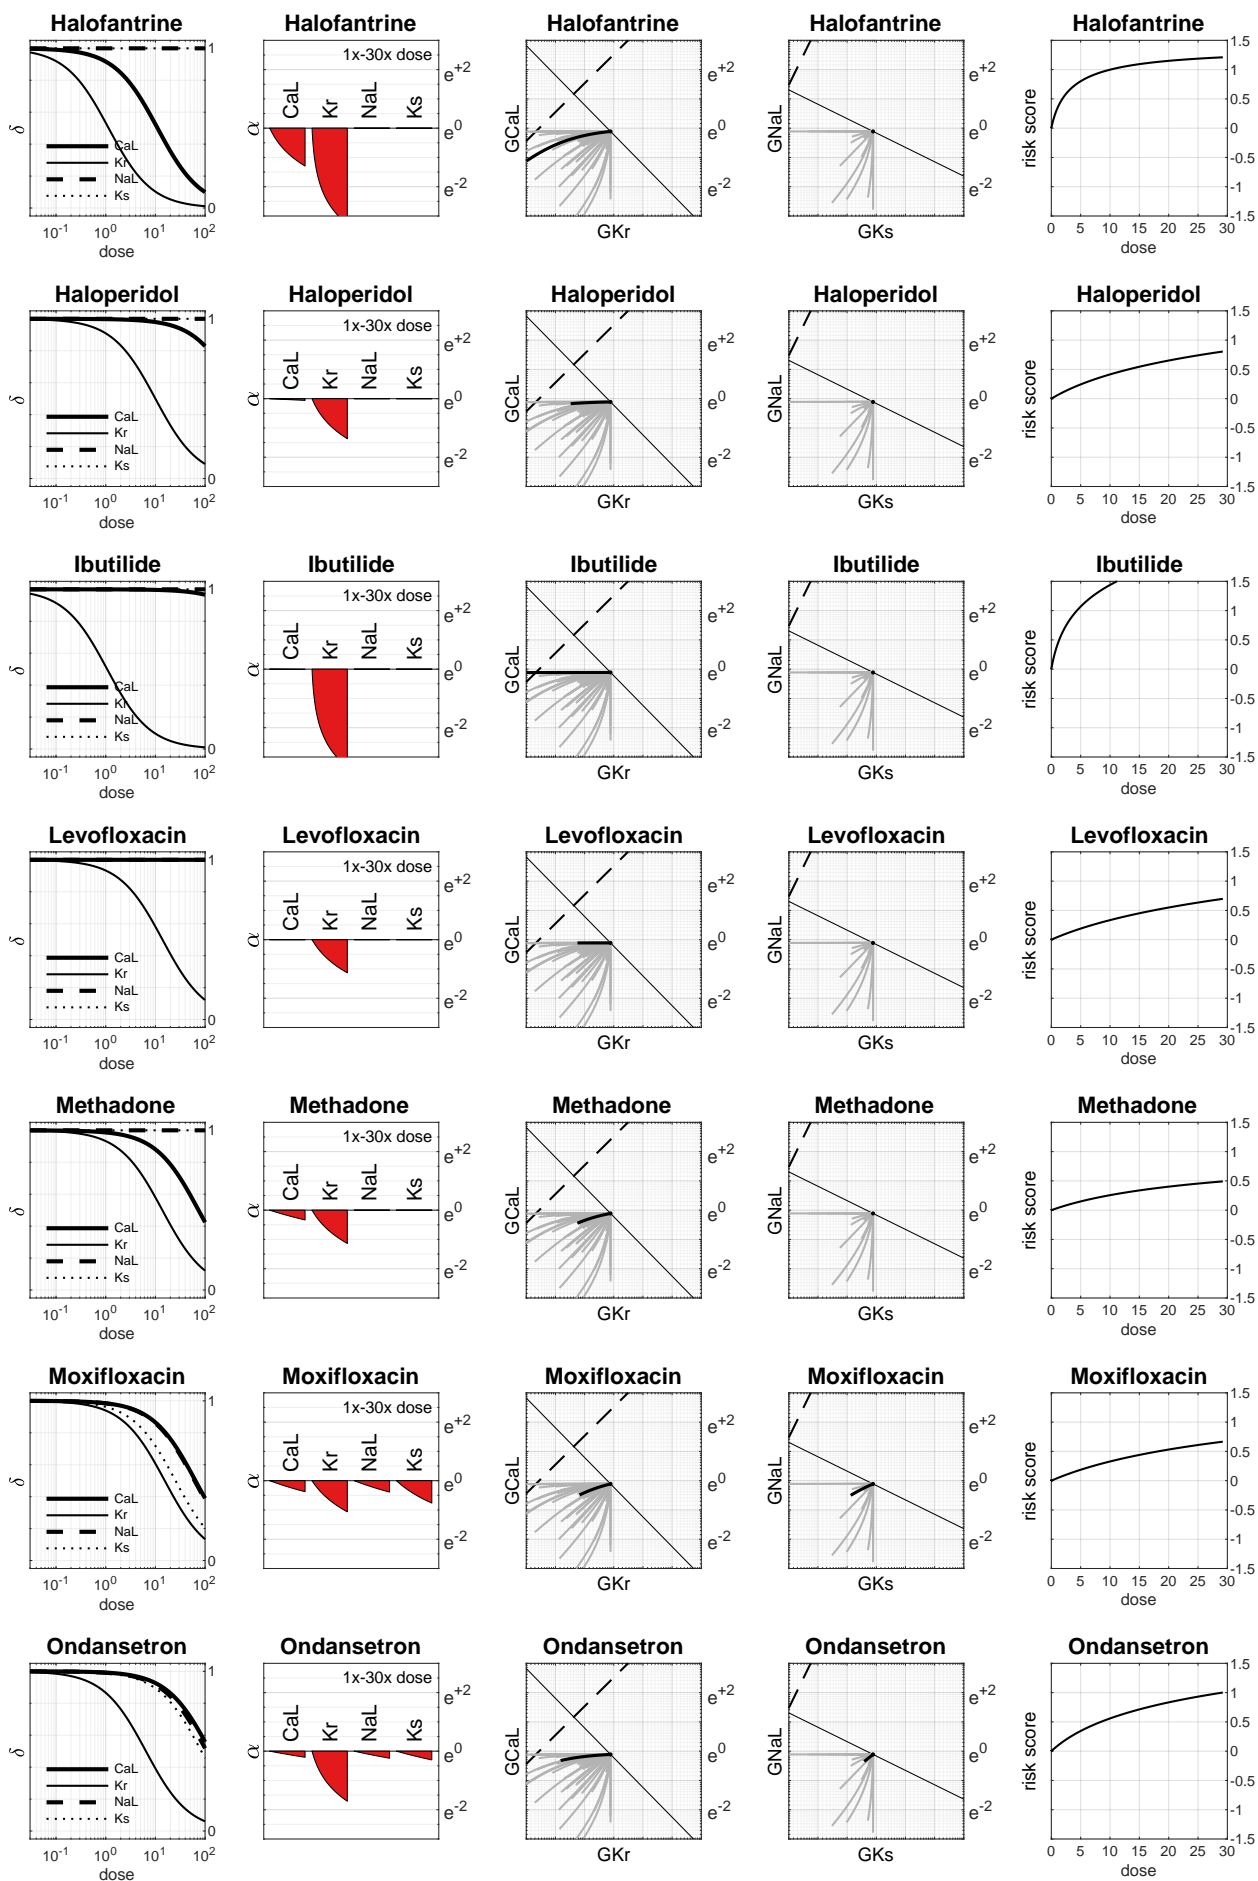

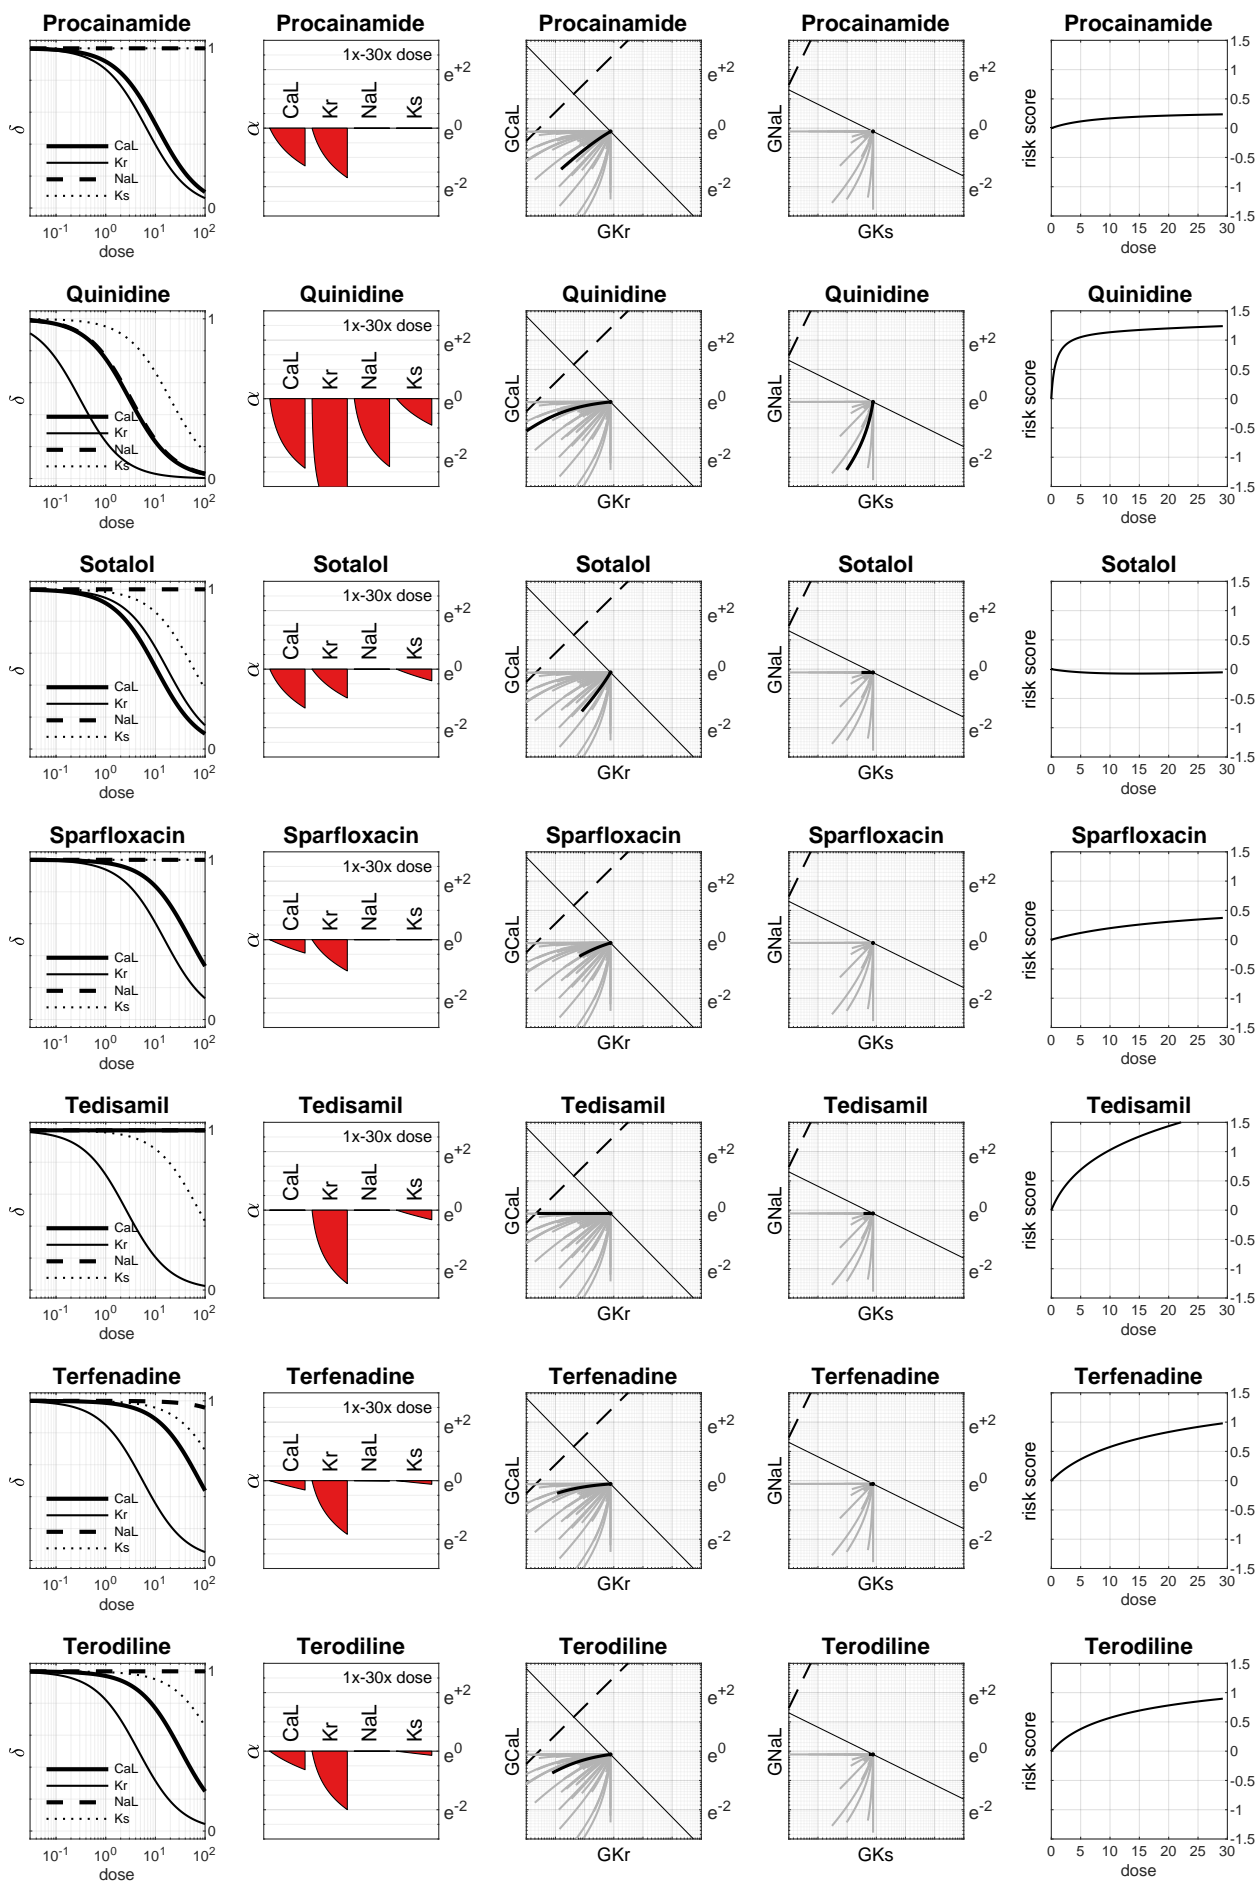

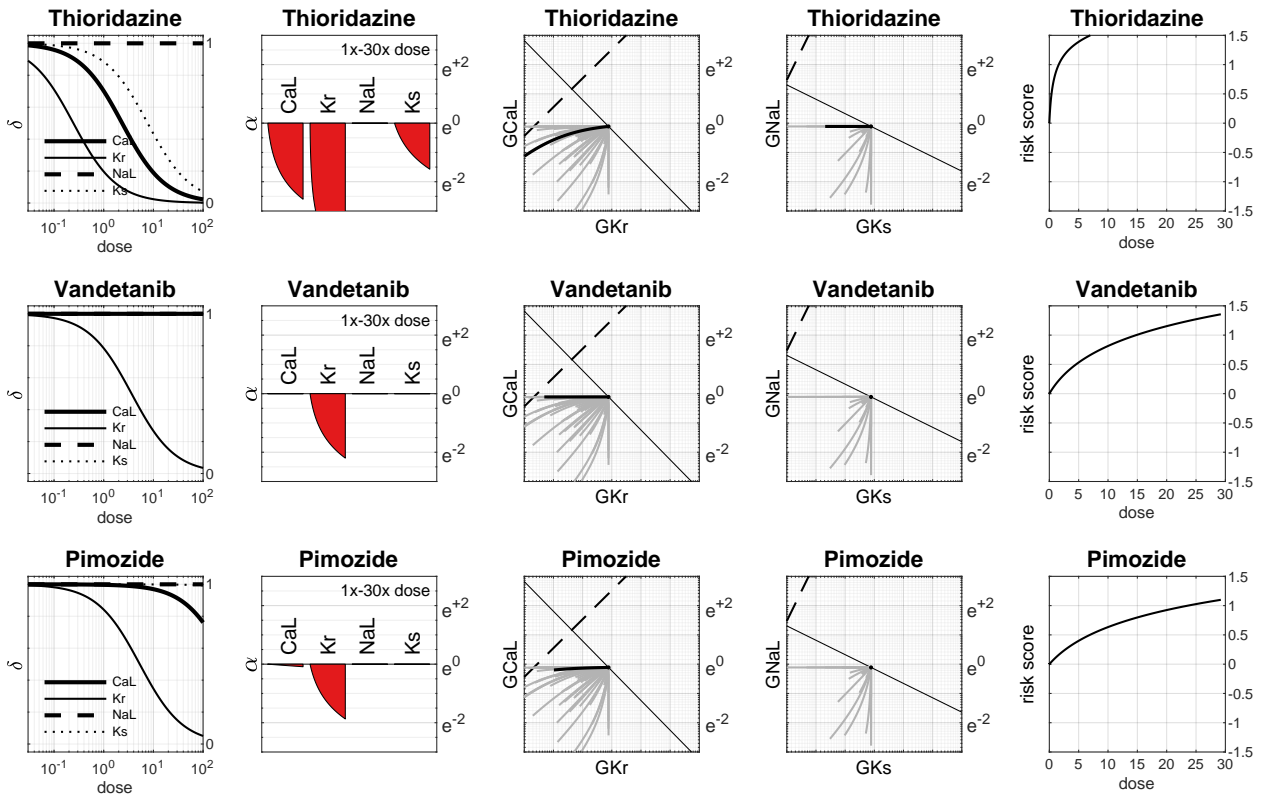

**Drugs with Class 2 Torsadogenic risk**

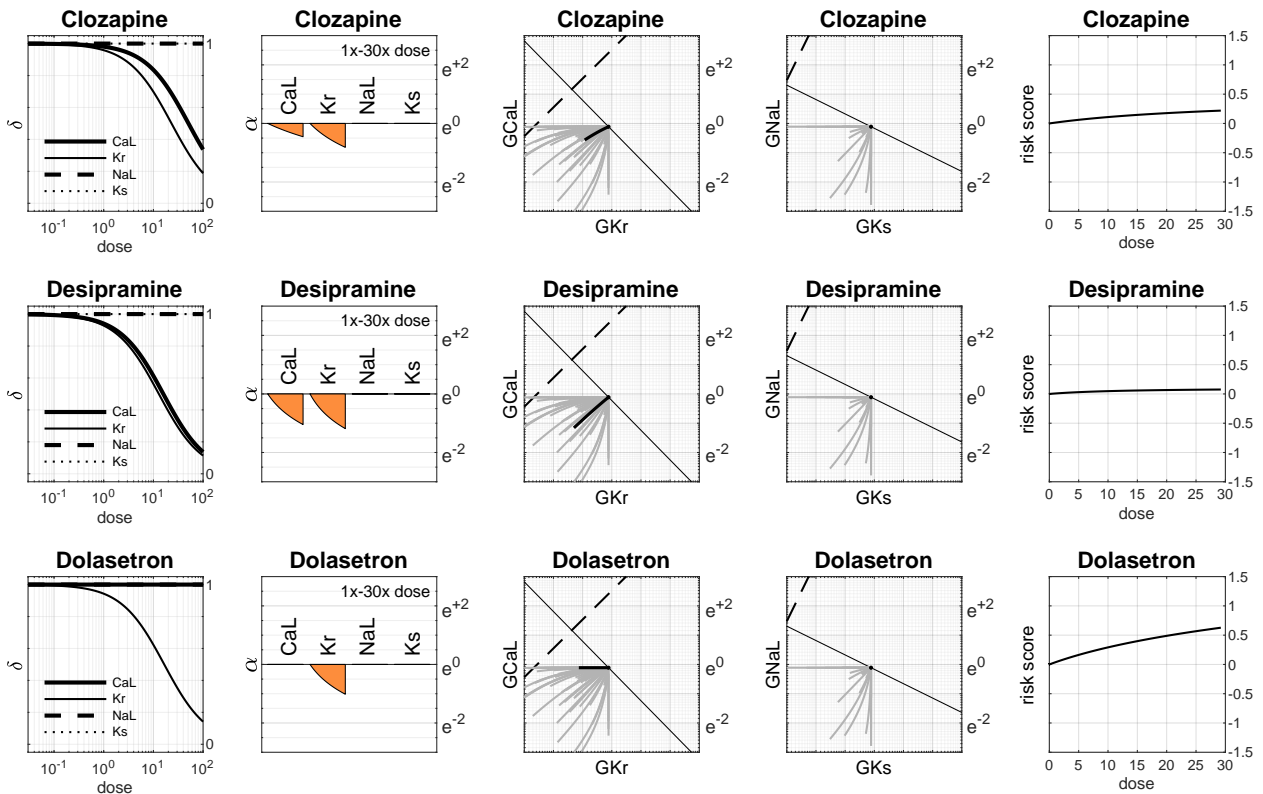

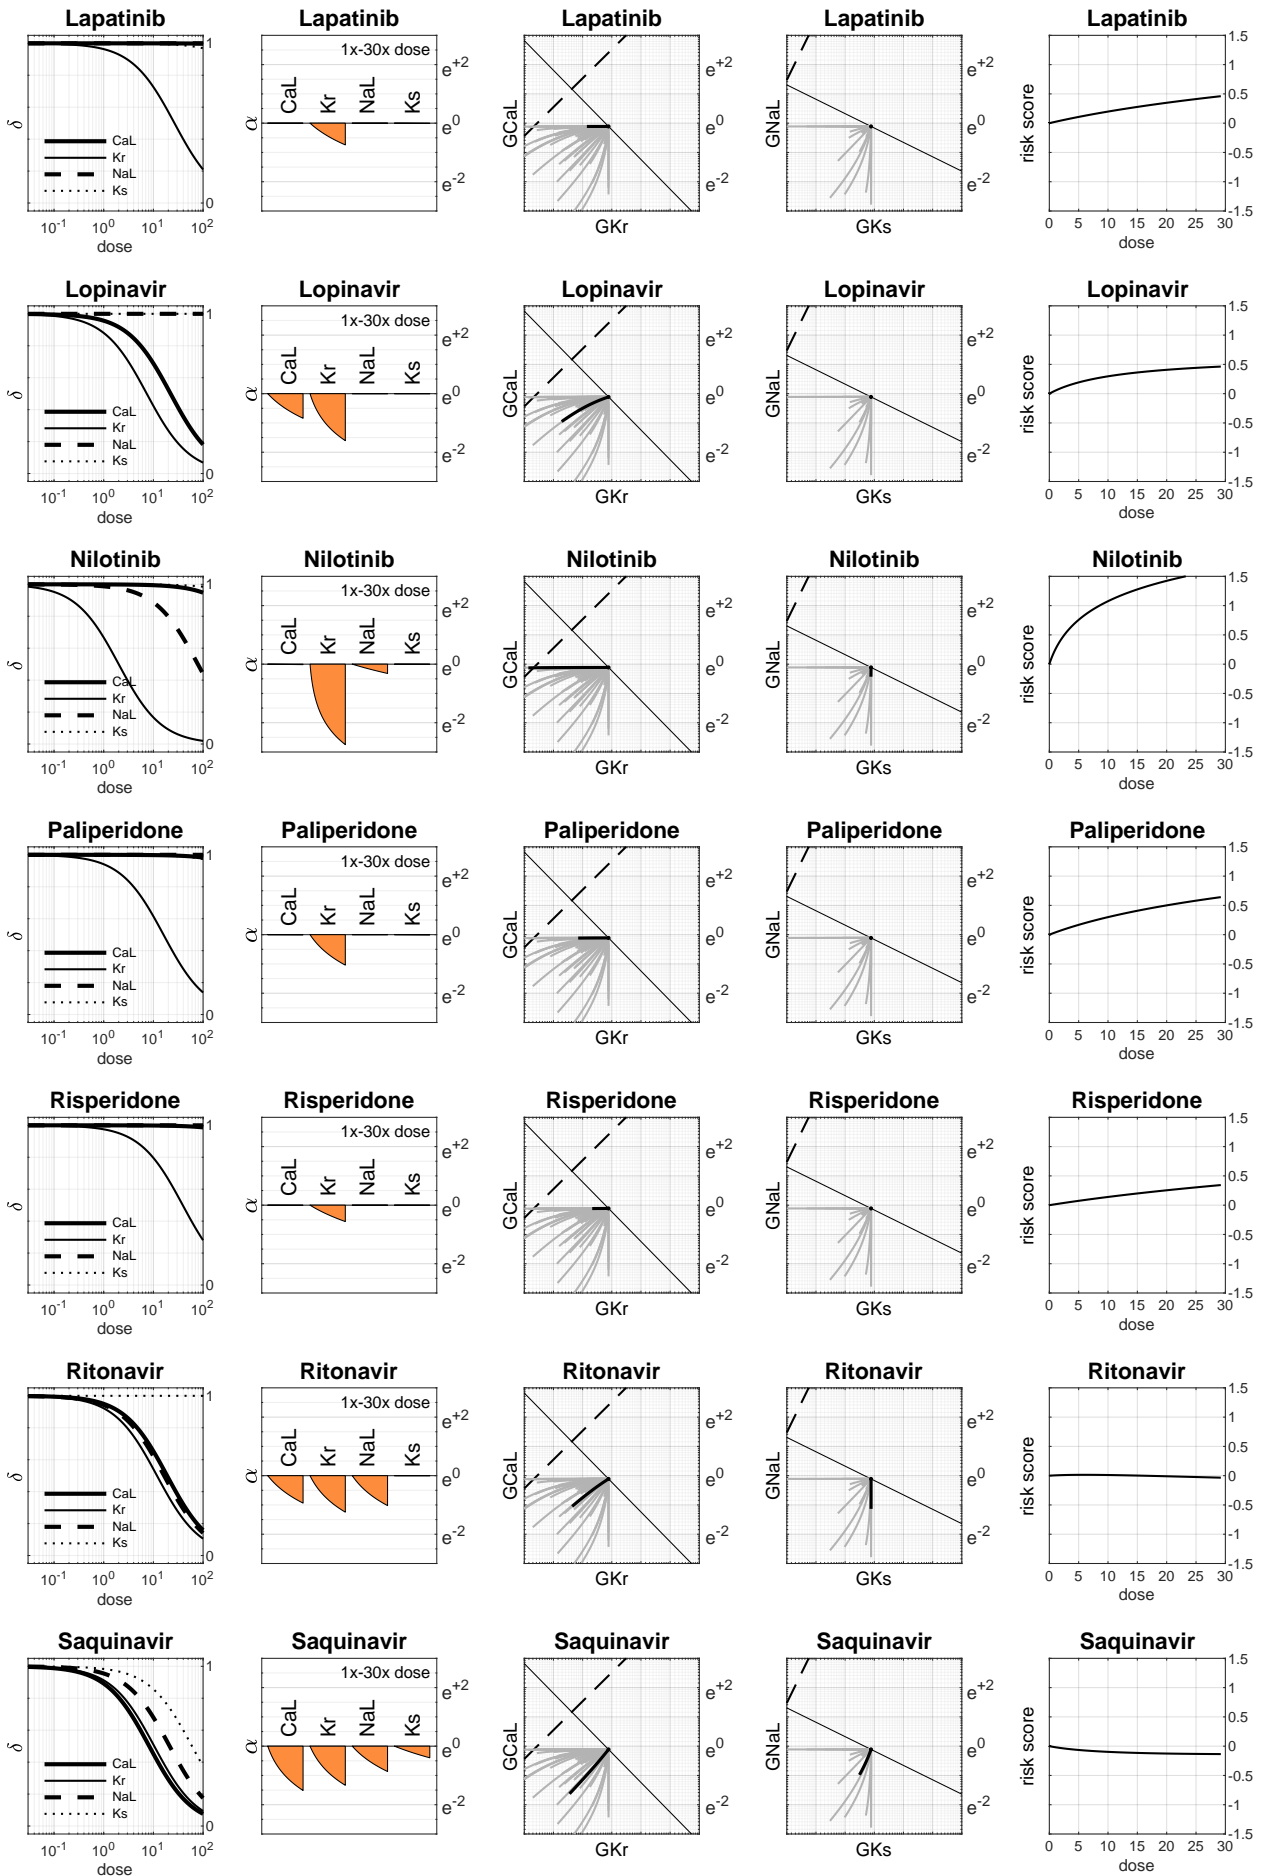

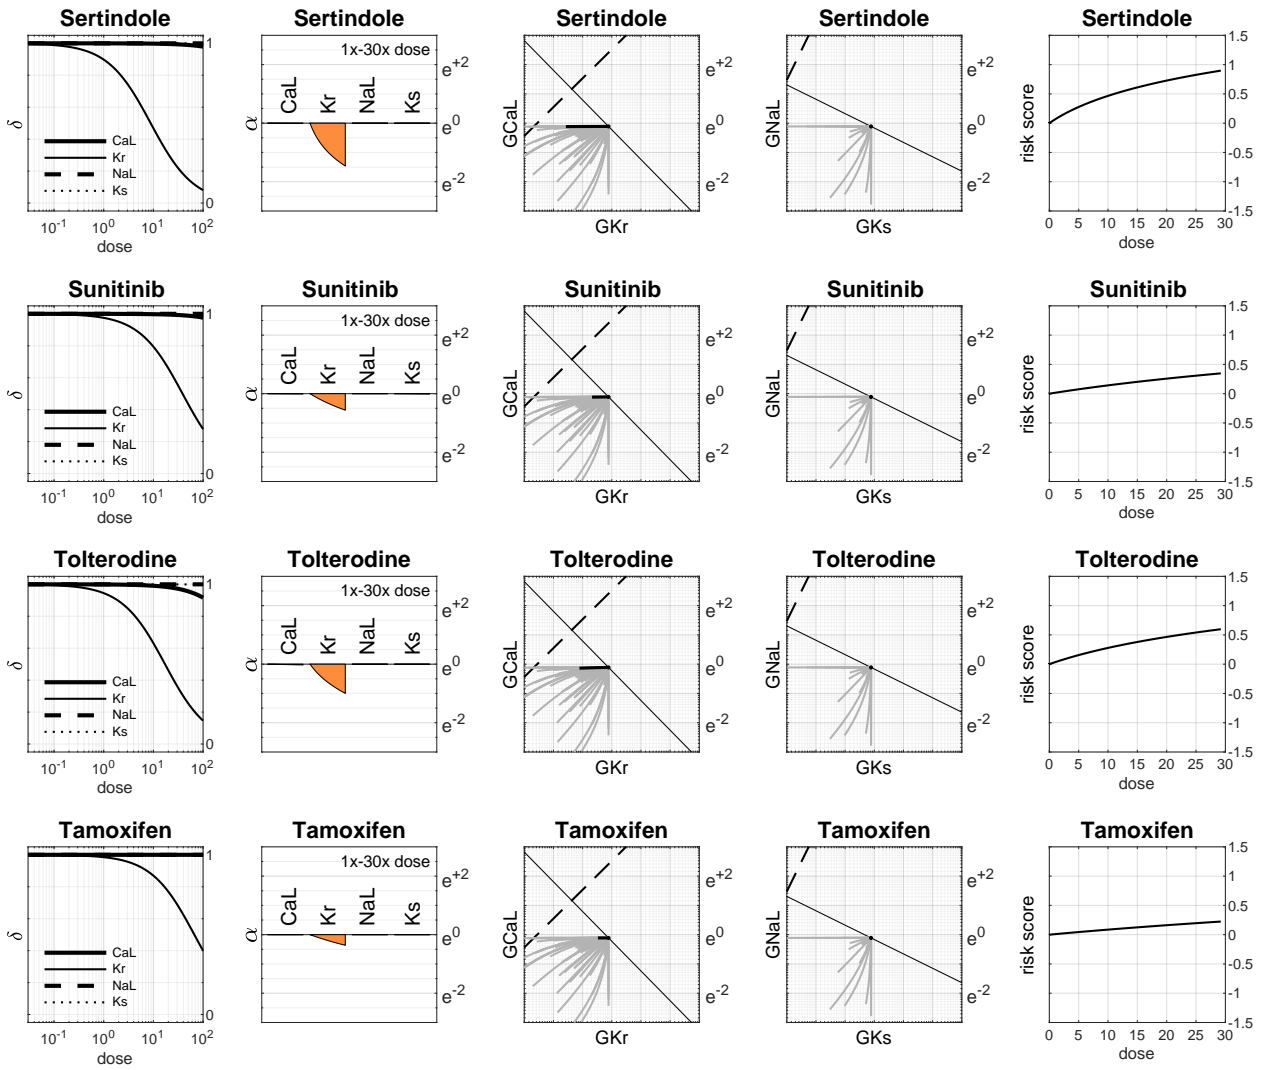

### Drugs with Class 3 Torsadogenic risk

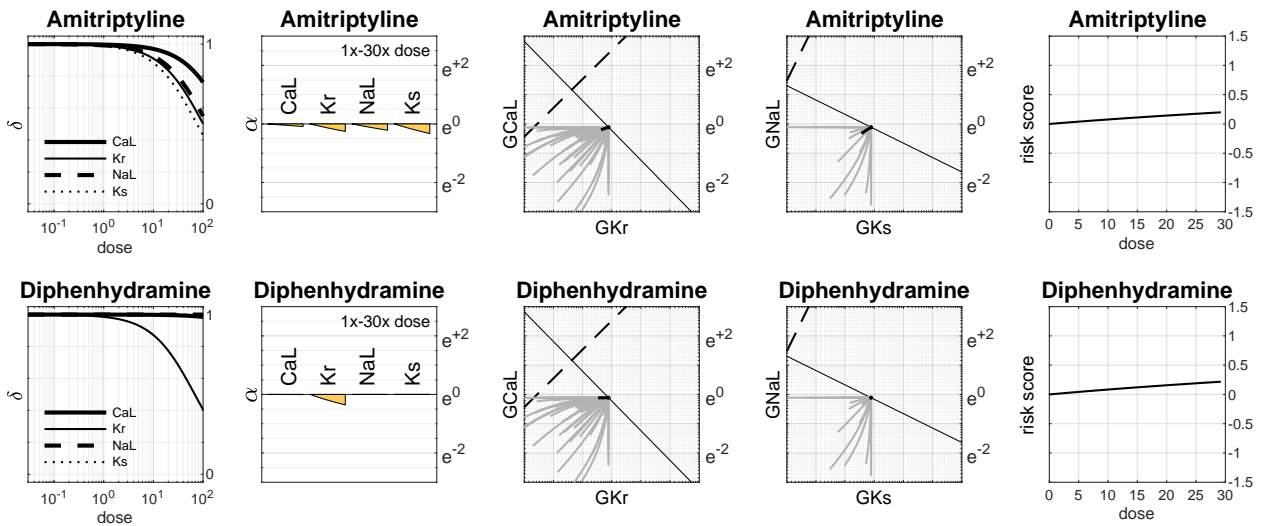



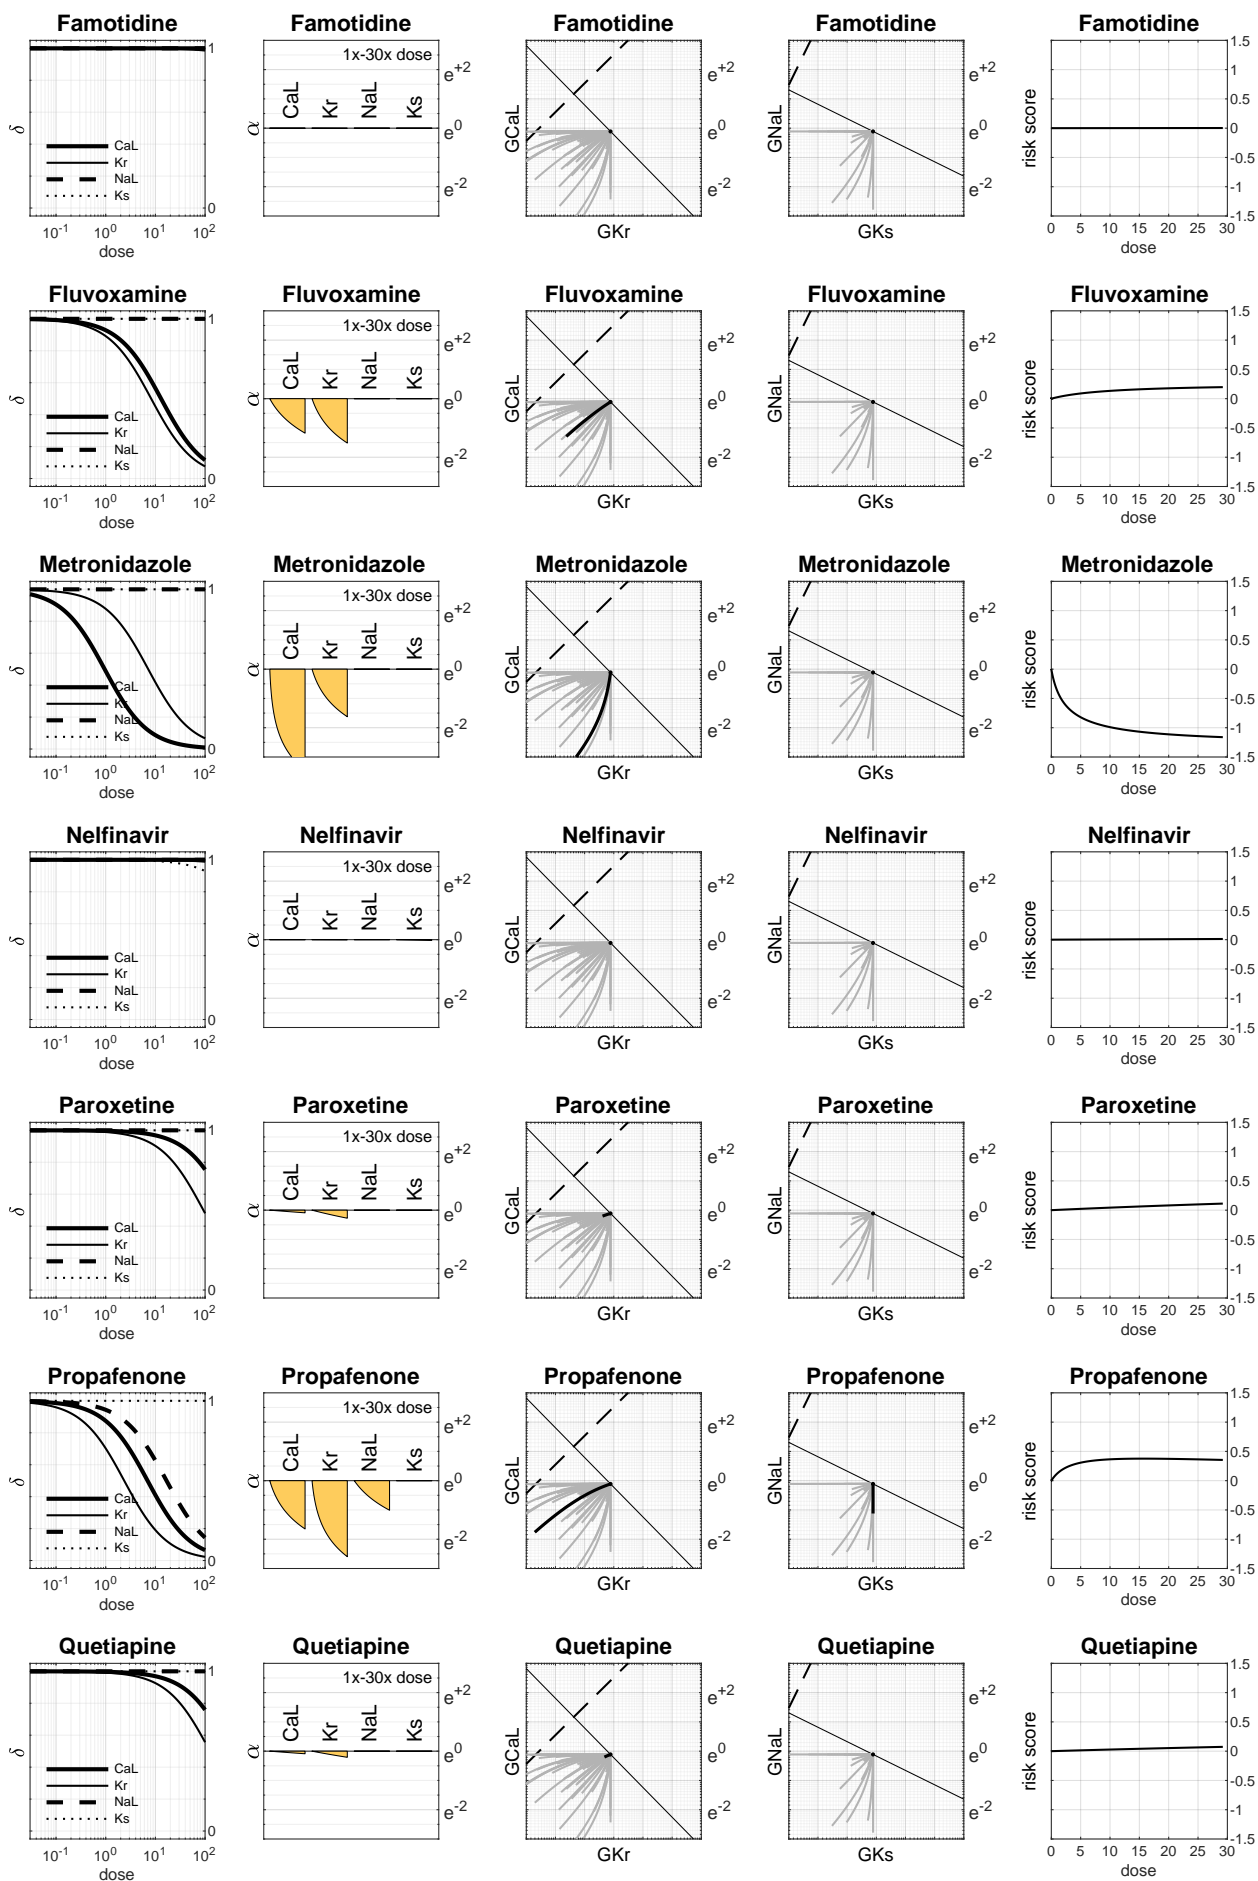

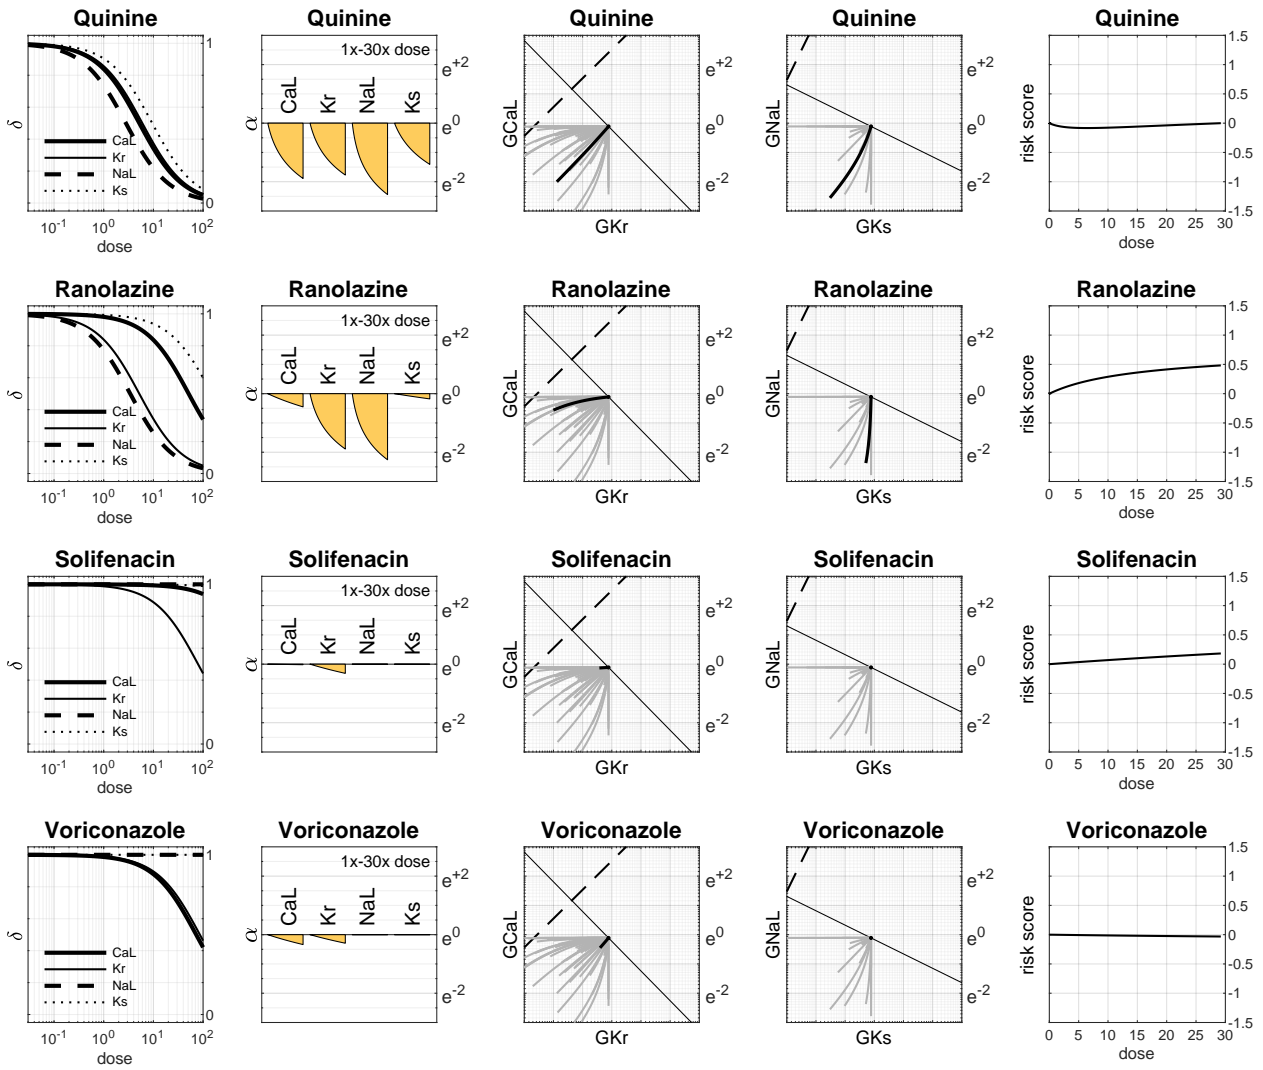

**Drugs with Class 4 Torsadogenic risk**

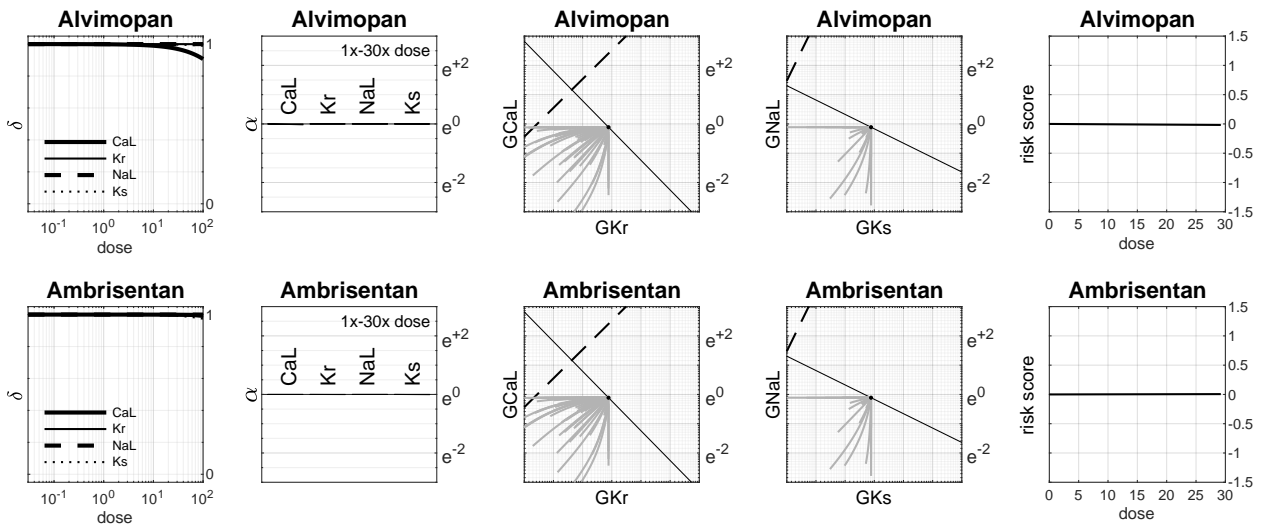

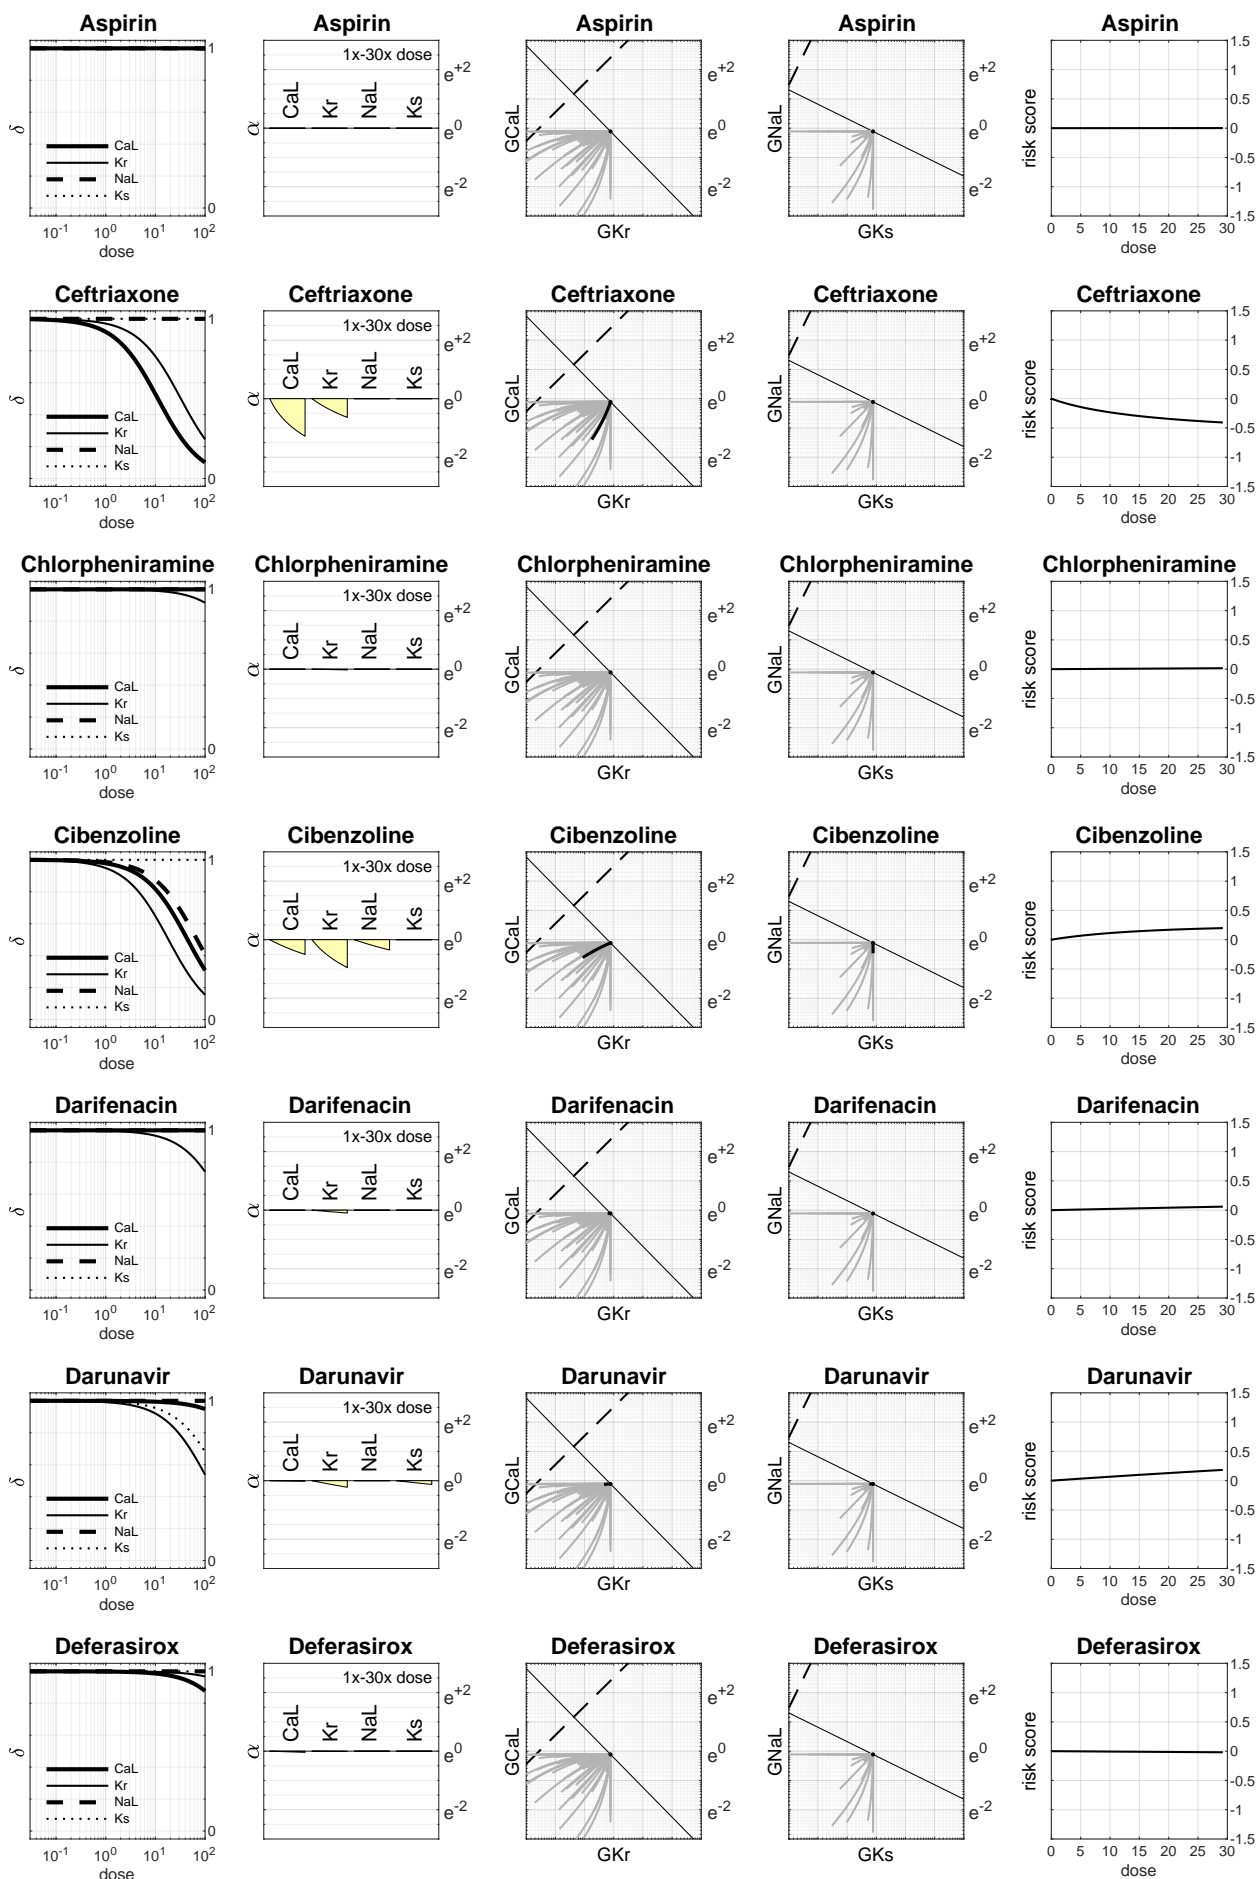

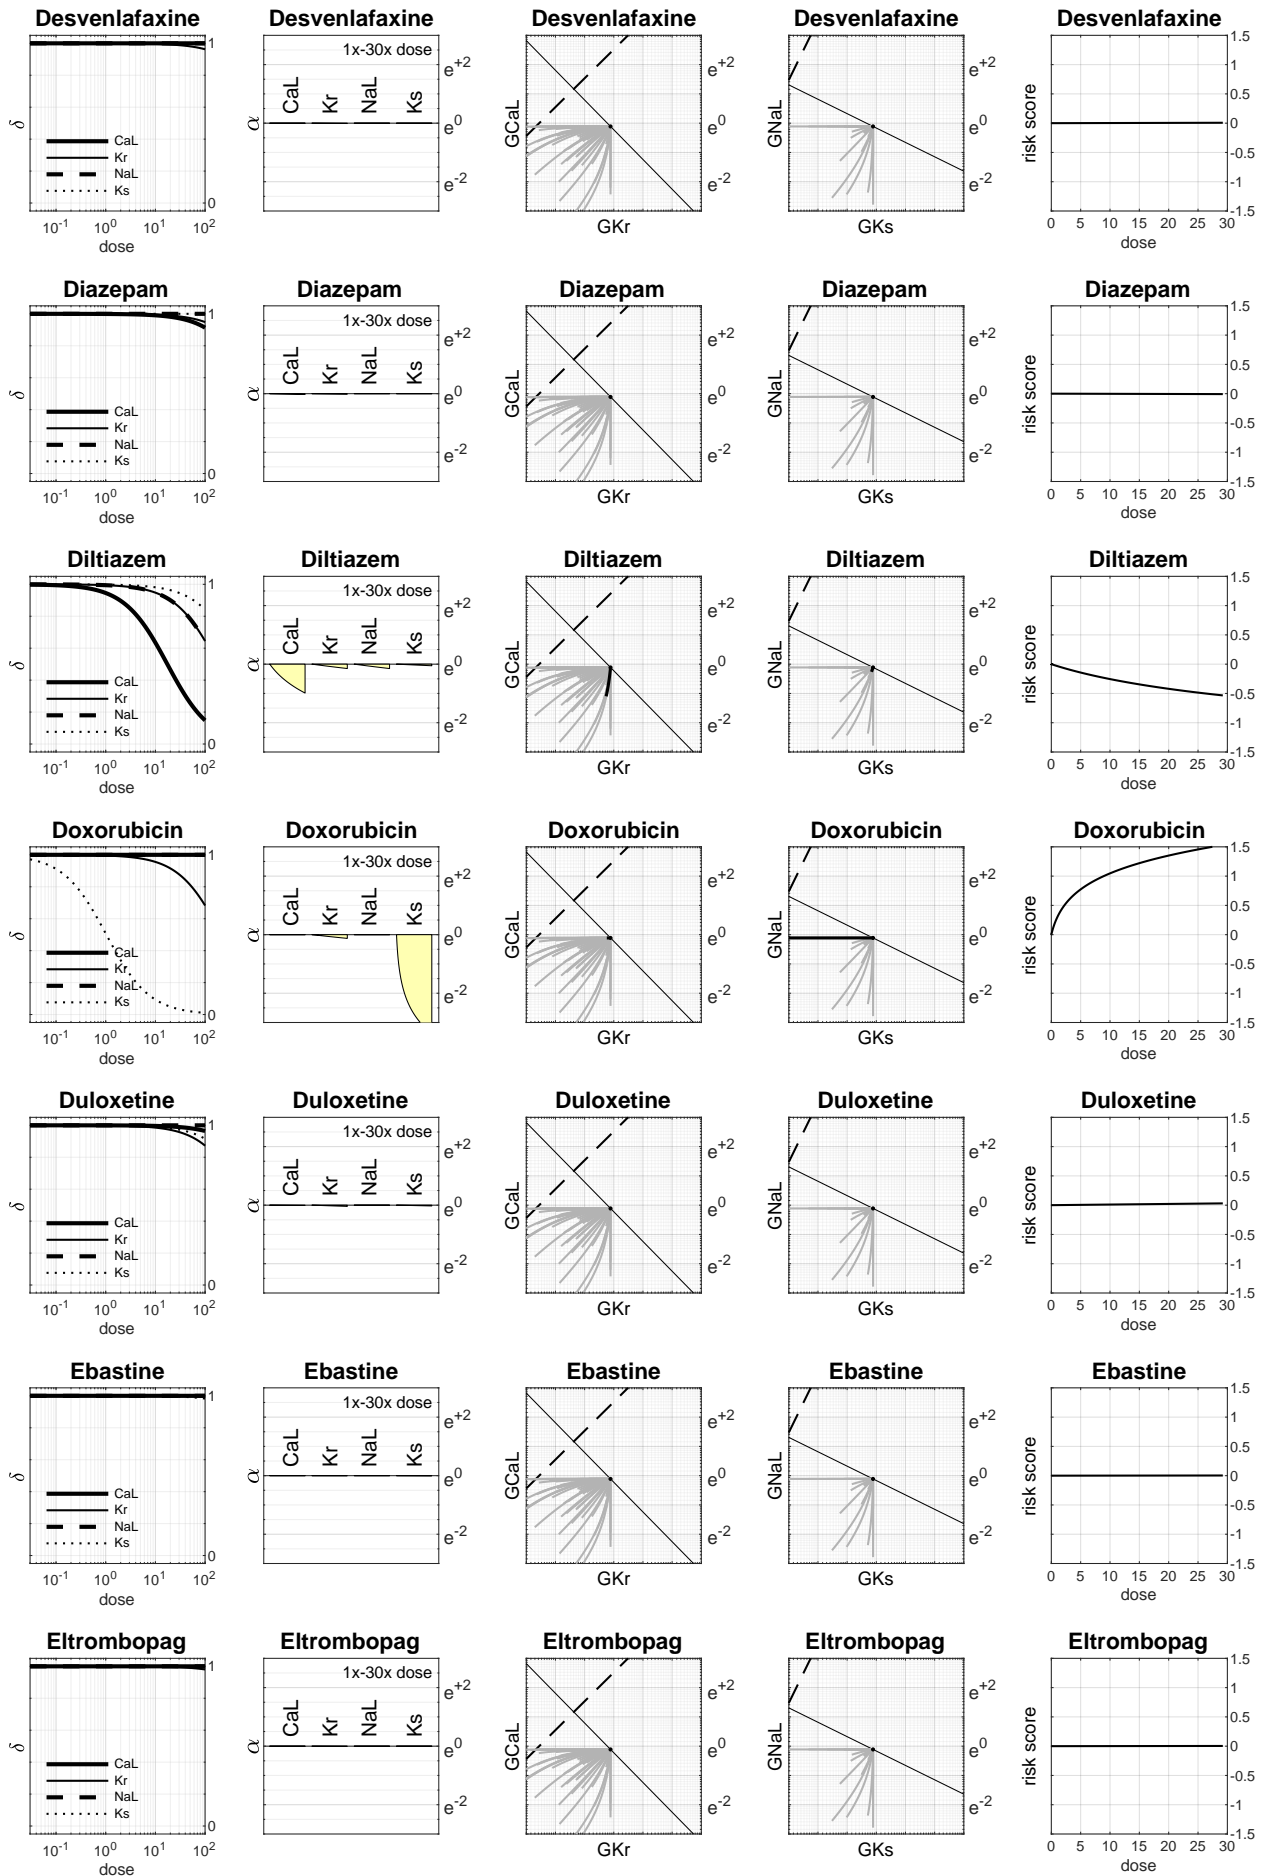

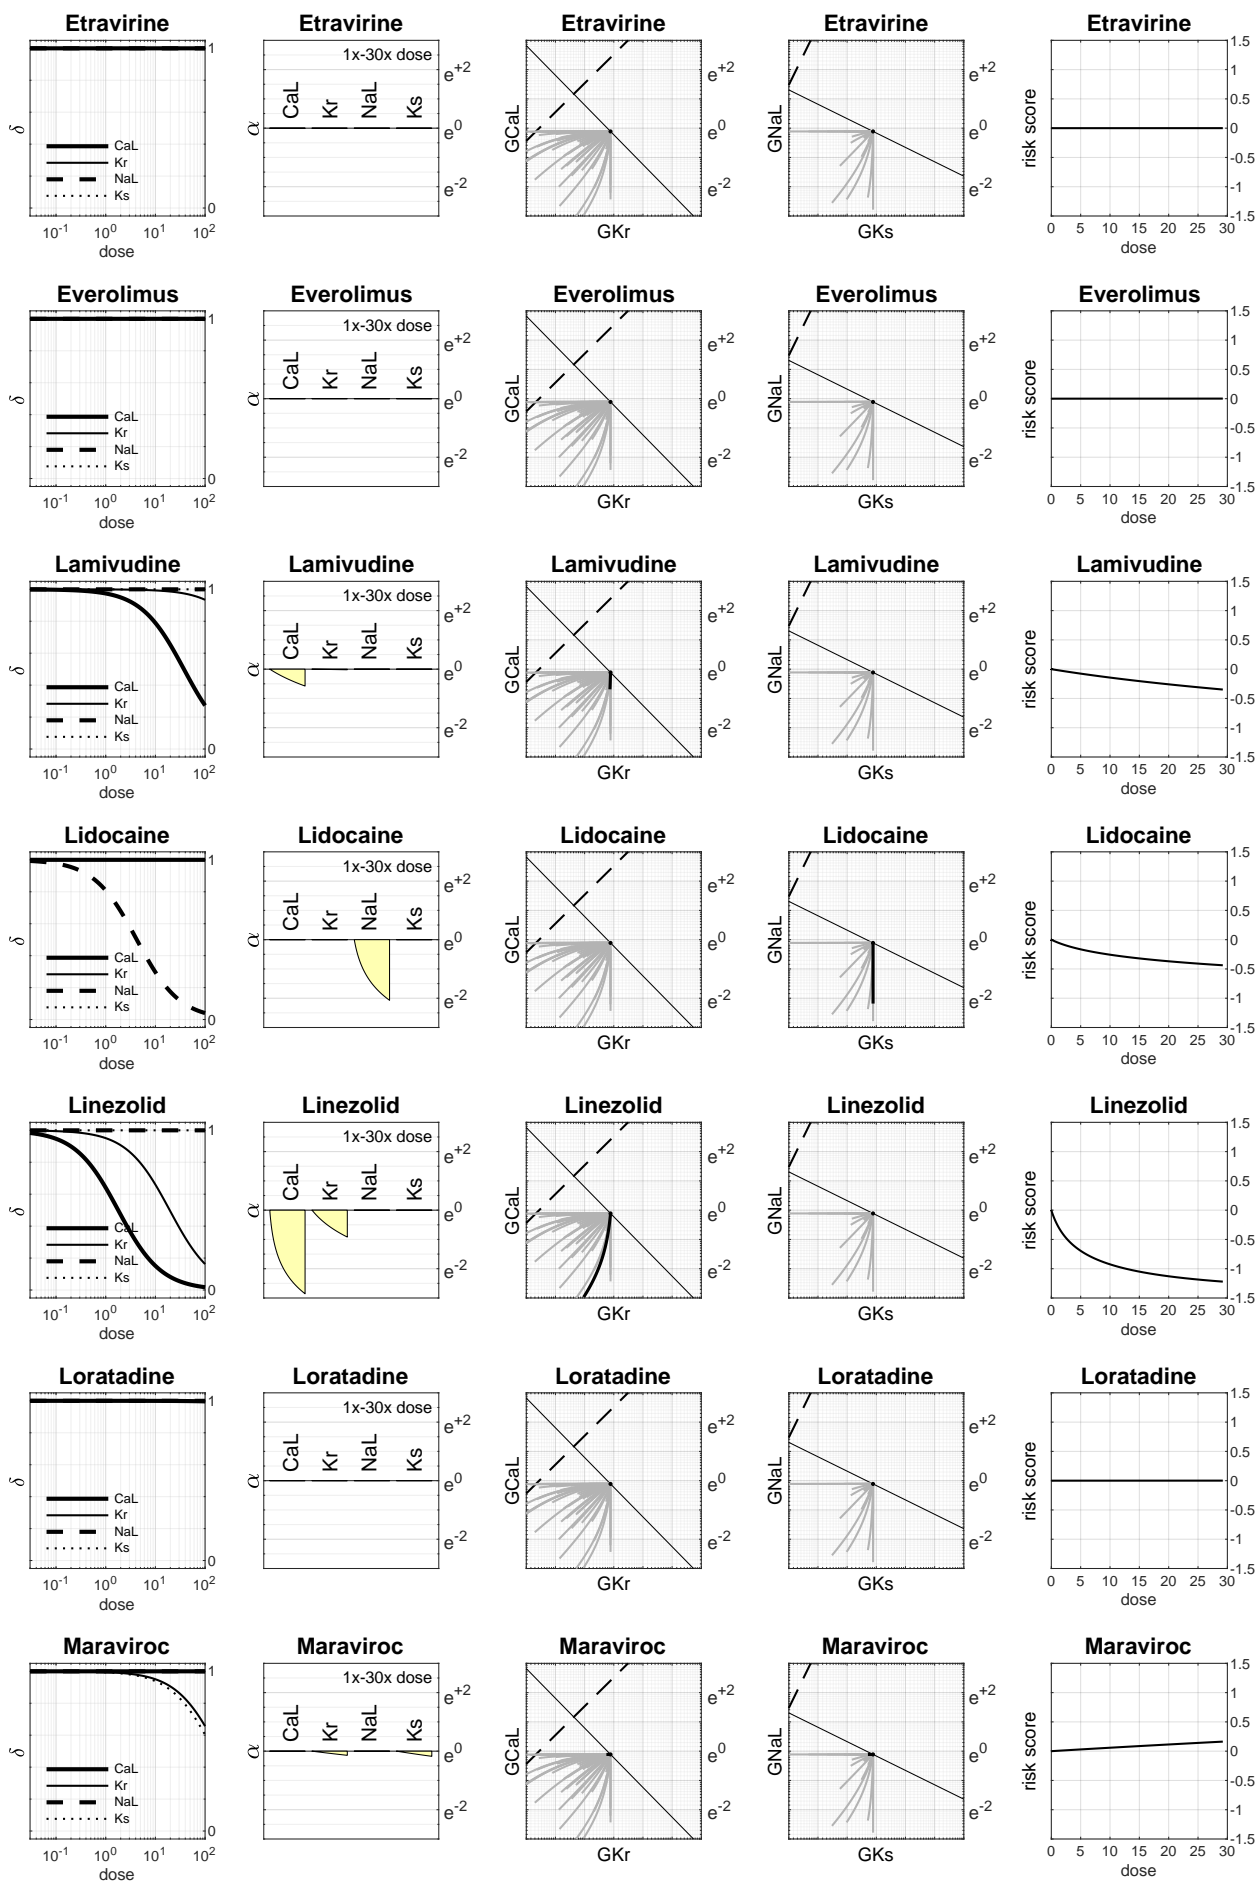

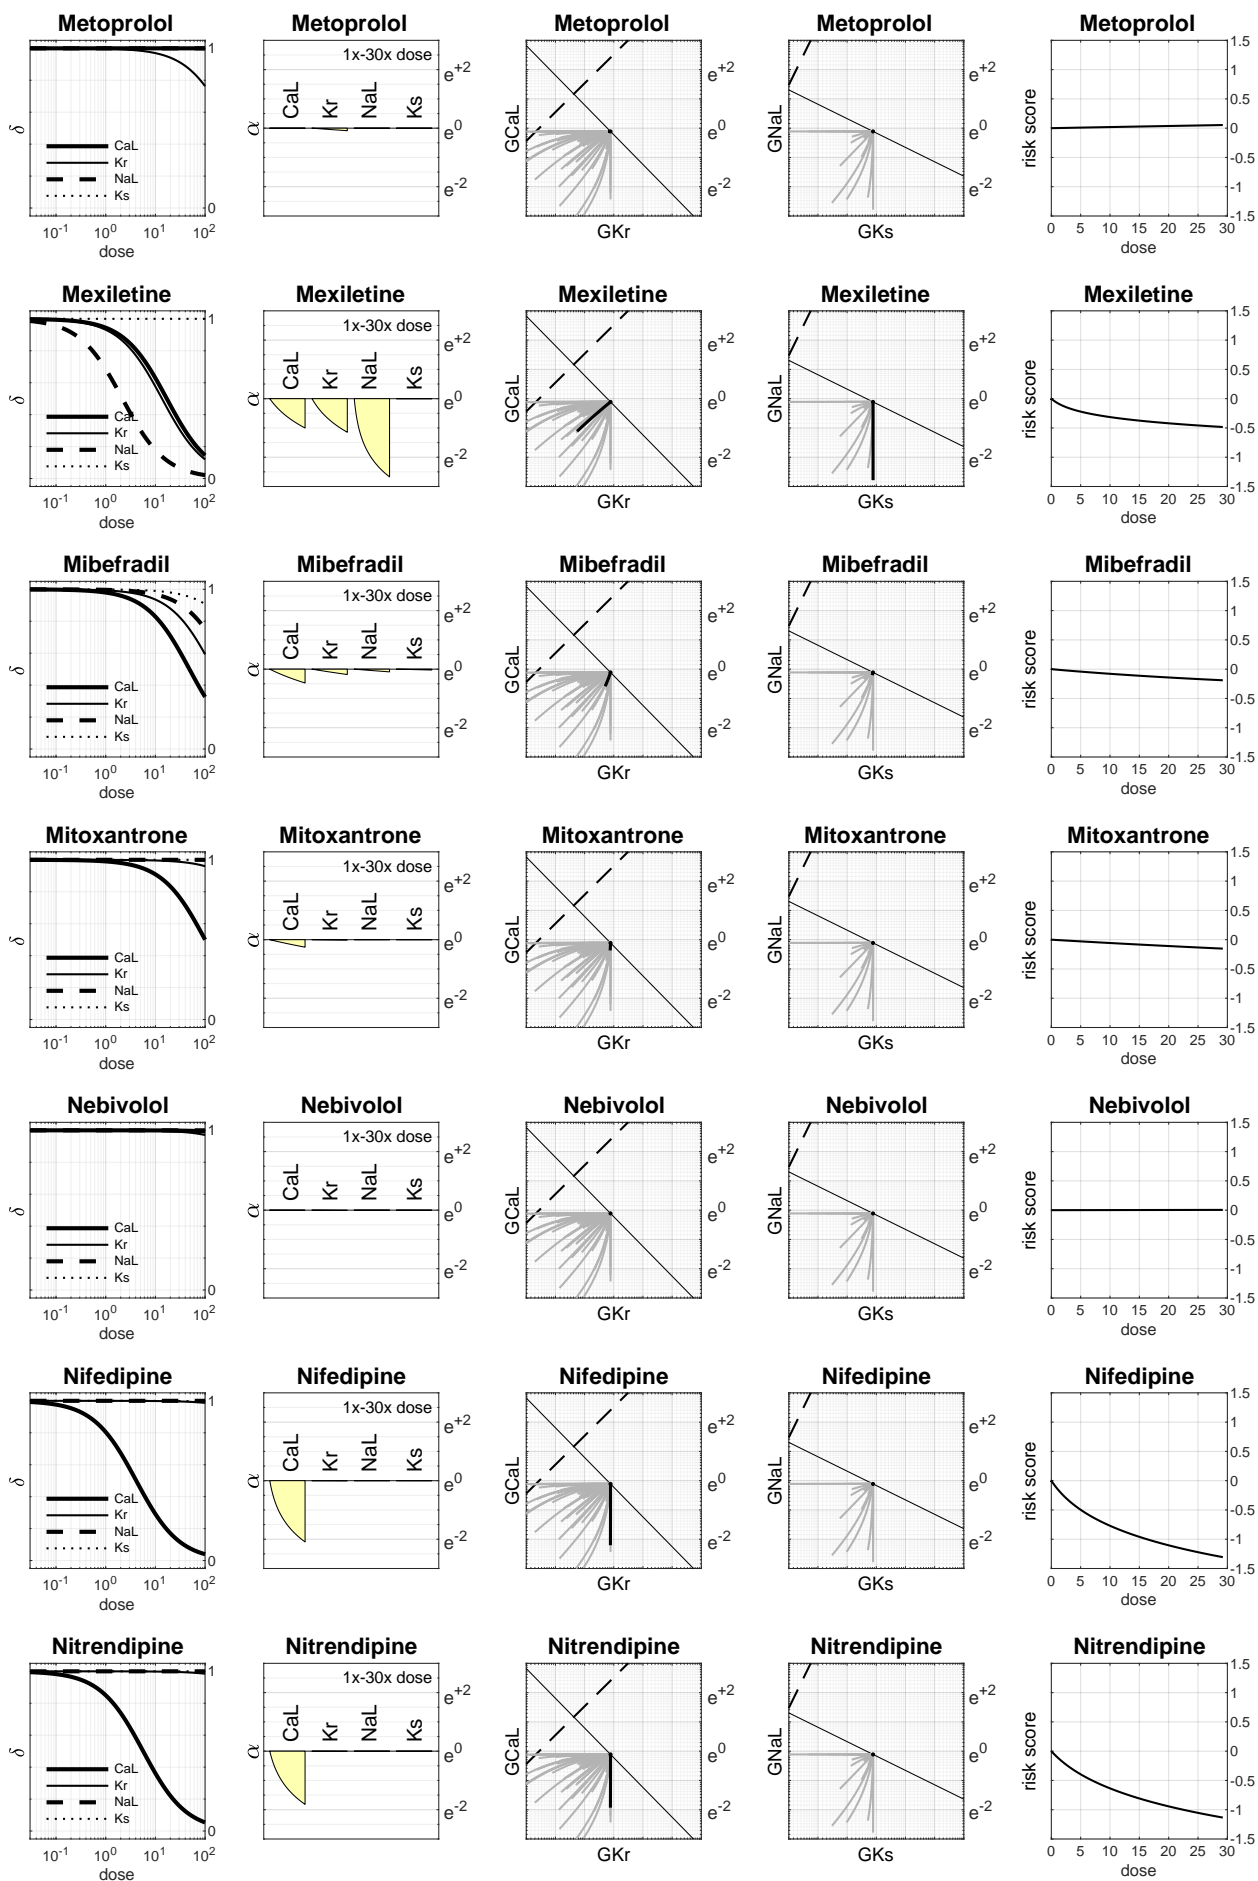

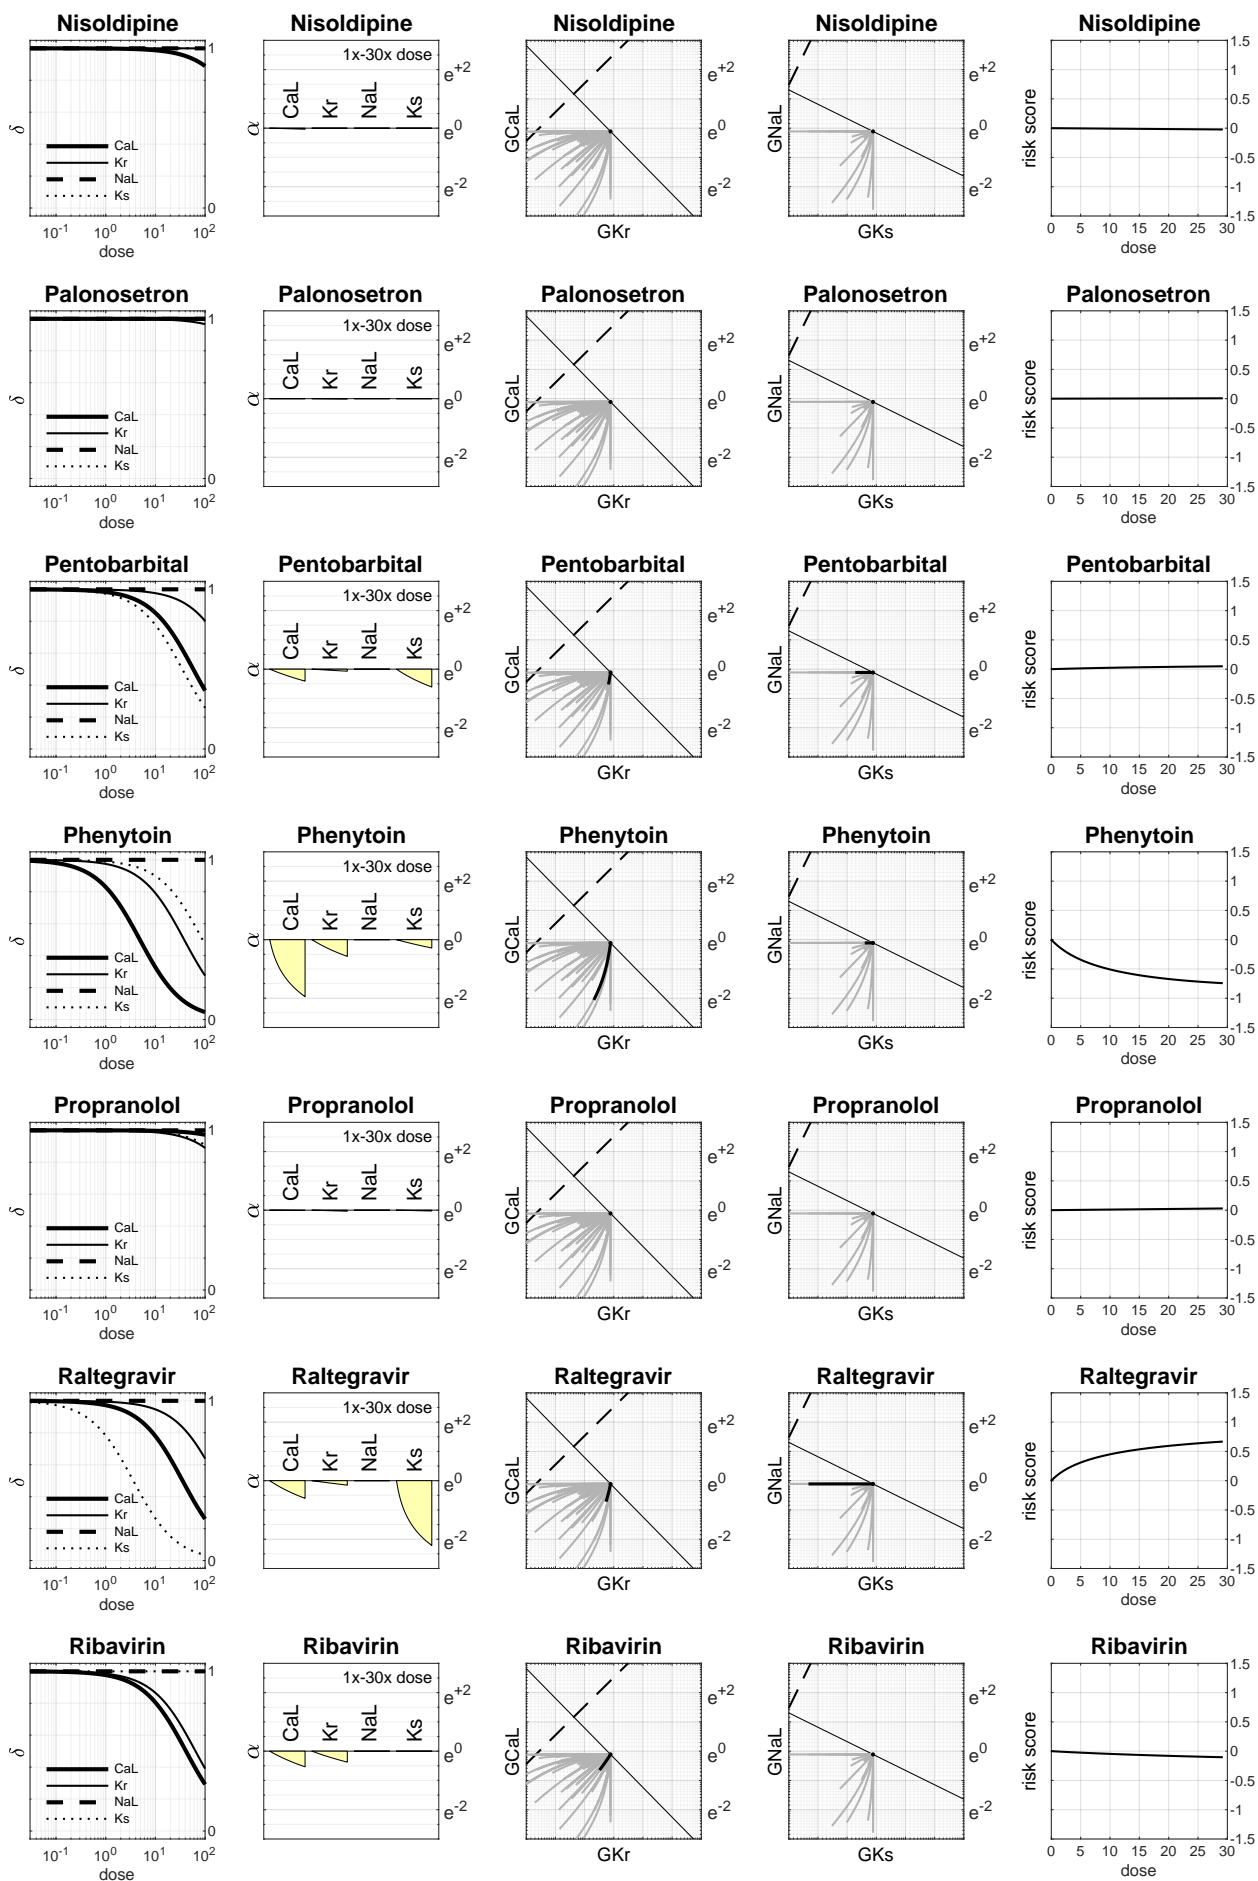

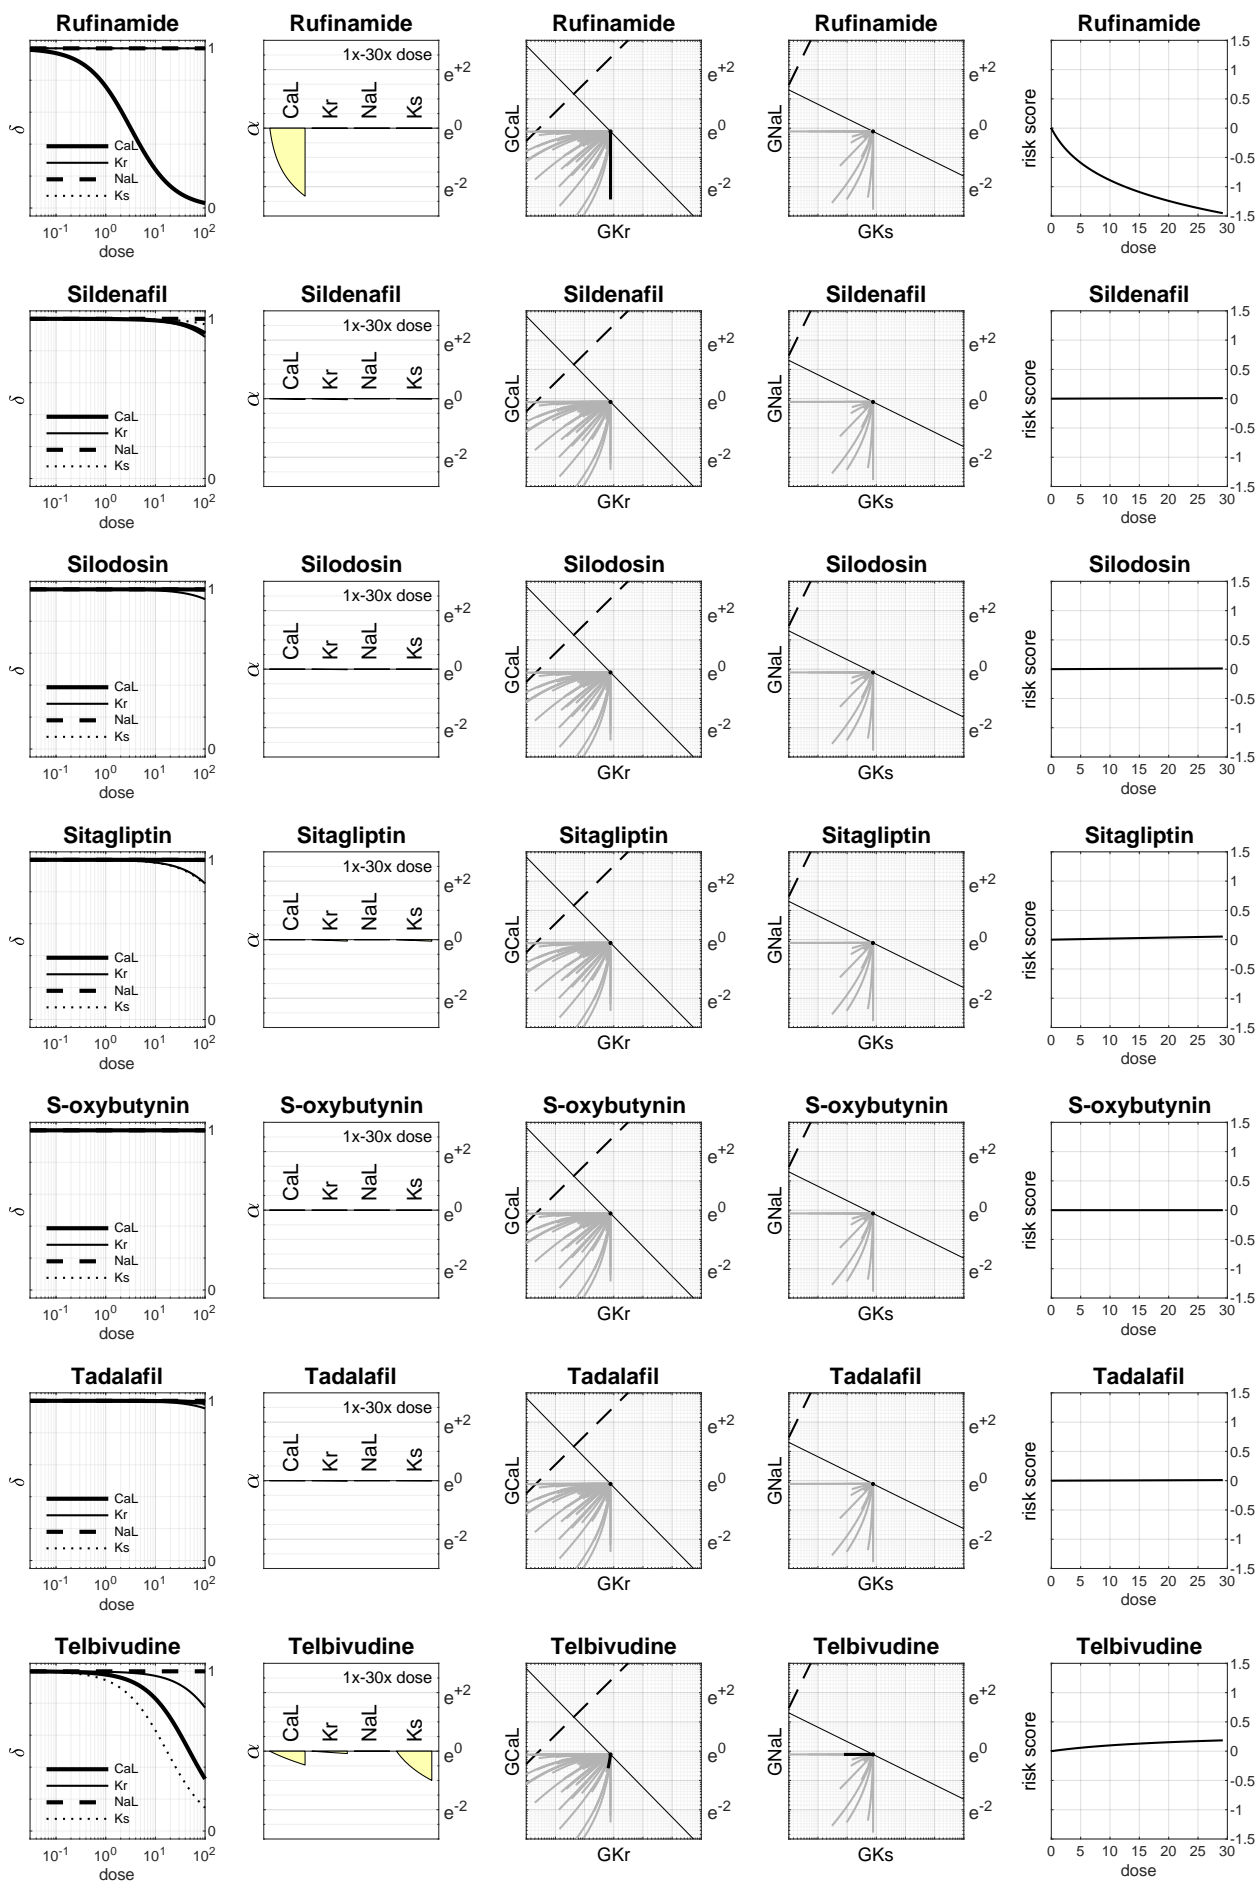



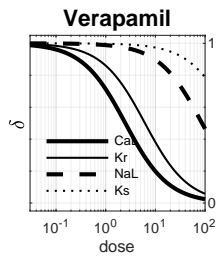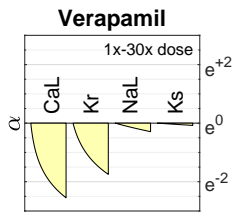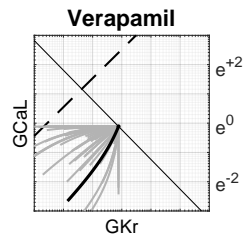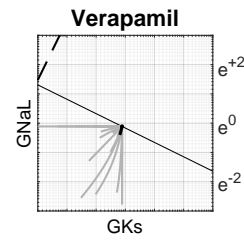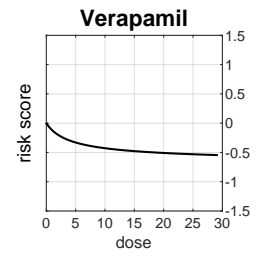

Supplement: table2-data2 [file elife-90027-table2-data2-v1.pdf]
